# Supplementary material for: Invasive vegetation affects amphibian skin microbiota and body condition
Source: PeerJ journal article supplement (doi:10.7717/peerj.8549), 2020-02-19
Supplement: PeerJ_Supp_updated.zip [file PeerJ_Supp_updated.zip]

| Assignment                        | ASV ID                            | LDA stats | Eucalyptus Sites |         |         | Quercus sites |         |         | Kingdom  | Phylum         | Class               | Taxonomy           |                     |                       | Genus                     | Species |
|-----------------------------------|-----------------------------------|-----------|------------------|---------|---------|---------------|---------|---------|----------|----------------|---------------------|--------------------|---------------------|-----------------------|---------------------------|---------|
|                                   |                                   |           | LDA p.value      | E1      | E2      | E3            | N1      | N2      |          |                |                     | N3                 | Order               | Family                |                           |         |
| Eucalyptus                        | 62ab3ec11e2c7d247ec90a01f0f08b127 | 0.56      | 0.025            | 0       | 1.3E-03 | 3.4E-04       | 0       | 7.3E-05 | 0        | Archaea        | Crenarchaeota       | Thaumarchaeota     | Nitrososphaerales   | Nitrososphaeraeae     | Candidatus Nitrososphaera |         |
|                                   | 1fad3b361787345c5c0112dbca74b747  | 0.52      | 0.035            | 0       | 9.8E-04 | 5.6E-04       | 0       | 0       | 0        | Bacteria       | Acidobacteria       | Chloracidobacteria | RB41                | Ellin6075             |                           |         |
|                                   | 6424250170a6c83ecdf0fde6603bcdbb  | 0.52      | 0.04             | 3.9E-04 | 0       | 3.2E-04       | 0       | 0       | 0        | Bacteria       | Acidobacteria       | Chloracidobacteria | RB41                | Ellin6075             |                           |         |
|                                   | 495dc33f1b13c310dd52835ca52eeeca4 | 0.81      | 0.005            | 5.4E-04 | 6.7E-03 | 1.0E-02       | 5.4E-04 | 4.9E-05 | 0        | Bacteria       | Acidobacteria       | Chloracidobacteria | RB41                |                       |                           |         |
|                                   | 4066eeaa496d43011db89efa755d95ba  | 0.52      | 0.04             | 0       | 9.1E-04 | 1.5E-03       | 0       | 0       | 0        | Bacteria       | Acidobacteria       | Chloracidobacteria | RB41                |                       |                           |         |
|                                   | 20b68a910cf9db4d08f7b7c220800316  | 0.73      | 0.005            | 1.9E-03 | 7.3E-03 | 3.7E-03       | 1.0E-03 | 1.6E-03 | 0        | Bacteria       | Acidobacteria       | Acidobacteria-6    | iii1-15             |                       |                           |         |
|                                   | 83358a5ba1eb9b35bf9b0c26f03ca1a6  | 0.63      | 0.005            | 2.2E-03 | 7.2E-04 | 3.4E-04       | 0       | 0       | 0        | Bacteria       | Acidobacteria       | Acidobacteria-6    | iii1-15             |                       |                           |         |
|                                   | 1c243c85d0ef1c7fb852db2f2f0274c9  | 0.68      | 0.01             | 1.2E-03 | 1.3E-03 | 1.9E-03       | 0       | 0       | 0        | Bacteria       | Acidobacteria       | Acidobacteria-6    | iii1-15             |                       |                           |         |
|                                   | 4b6fed1a8a1398c3536613393c715da   | 0.68      | 0.01             | 2.3E-03 | 2.5E-03 | 1.3E-03       | 0       | 0       | 0        | Bacteria       | Acidobacteria       | Acidobacteria-6    | iii1-15             |                       |                           |         |
|                                   | d60f5b0e9d8b7216fed265f51c8cbfa   | 0.62      | 0.015            | 1.1E-03 | 0       | 1.1E-03       | 0       | 4.9E-04 | 3.5E-04  | Bacteria       | Acidobacteria       | Acidobacteria-6    | iii1-15             |                       |                           |         |
|                                   | 9be6b9155e116fa92bde4784765acef7  | 0.52      | 0.04             | 0       | 3.2E-03 | 2.2E-03       | 0       | 0       | 0        | Bacteria       | Acidobacteria       | Acidobacteria-6    | iii1-15             |                       |                           |         |
|                                   | 01e621899ab9f3a202c6c89a2f8df7d   | 0.52      | 0.05             | 0       | 0       | 9.3E-04       | 0       | 0       | 0        | Bacteria       | Acidobacteria       | Acidobacteriia     | Acidobacteriales    | Koribacteraceae       | Candidatus Koribacter     |         |
|                                   | be1265dcf110303ae9205c70df189f2c  | 0.58      | 0.02             | 0       | 1.9E-03 | 1.0E-03       | 0       | 0       | 0        | Bacteria       | Acidobacteria       | Acidobacteriia     | Acidobacteriales    | Koribacteraceae       |                           |         |
|                                   | c7ccc5561c0d0af024d0908d621e68b   | 0.58      | 0.02             | 0       | 3.3E-04 | 1.5E-03       | 0       | 0       | 0        | Bacteria       | Acidobacteria       | Acidobacteriia     | Acidobacteriales    | Koribacteraceae       |                           |         |
|                                   | 93639a4d6b4e945d9ac2d5b2de92b43c  | 0.52      | 0.035            | 0       | 1.8E-03 | 1.2E-03       | 0       | 0       | 0        | Bacteria       | Acidobacteria       | Acidobacteriia     | Acidobacteriales    | Koribacteraceae       |                           |         |
|                                   | 29867c223fdd5357c126ea6d169a81a   | 0.52      | 0.03             | 1.5E-03 | 0       | 1.7E-04       | 0       | 0       | 0        | Bacteria       | Acidobacteria       | Solibacteres       | Solibacterales      | Bryobacteraceae       |                           |         |
|                                   | f735e0fcd4a05fa27bf9d42df6d2d37   | 0.63      | 0.01             | 2.9E-04 | 3.3E-04 | 1.1E-03       | 0       | 0       | 0        | Bacteria       | Acidobacteria       | Solibacteres       | Solibacterales      |                       |                           |         |
|                                   | 08c9926357a5630b9690ef5d0d1ba37b  | 0.52      | 0.03             | 9.3E-04 | 0       | 6.4E-04       | 0       | 0       | 0        | Bacteria       | Acidobacteria       | Sva0725            | Sva0725             |                       |                           |         |
|                                   | 15d0c75db0d4705f5d404770a59c8f00  | 0.86      | 0.005            | 8.8E-04 | 5.2E-04 | 1.3E-03       | 0       | 0       | 0        | Bacteria       | Actinobacteria      | Acidimicrobia      | Acidimicrobiales    | EB1017                |                           |         |
|                                   | 4ca10b0d5684db2b0f71bb339fbf8cd2  | 0.71      | 0.015            | 1.2E-03 | 2.0E-03 | 6.1E-04       | 5.9E-04 | 1.7E-04 | 0        | Bacteria       | Actinobacteria      | Acidimicrobia      | Acidimicrobiales    |                       |                           |         |
|                                   | 20e460578e224ba162d2c785d9bce76d  | 0.58      | 0.02             | 0       | 6.5E-05 | 3.9E-04       | 0       | 0       | 0        | Bacteria       | Actinobacteria      | Acidimicrobia      | Acidimicrobiales    |                       |                           |         |
|                                   | 805ec6336f69e5e95ad5703740aa8bf67 | 0.57      | 0.05             | 2.0E-04 | 3.3E-04 | 3.0E-03       | 1.5E-04 | 0       | 0        | Bacteria       | Actinobacteria      | Actinobacteria     | Actinomycetales     | Micrococccaeae        | Arthrobacter              |         |
|                                   | ee4cd11e5afca311bdf7b16c4002d6    | 0.63      | 0.015            | 1.4E-03 | 2.2E-03 | 1.7E-03       | 0       | 0       | 0        | Bacteria       | Actinobacteria      | Actinobacteria     | Actinomycetales     | Micromonosporaceae    |                           |         |
|                                   | 24f128b8910f158454543016c005181b  | 0.58      | 0.03             | 9.3E-04 | 0       | 8.1E-04       | 0       | 0       | 0        | Bacteria       | Actinobacteria      | Actinobacteria     | Actinomycetales     | Nocardioidaceae       | Kribbella                 |         |
|                                   | 80d4a877f4628dfc2e78d2ffa9a149d9  | 0.52      | 0.04             | 2.9E-04 | 7.2E-04 | 1.5E-04       | 0       | 0       | 0        | Bacteria       | Actinobacteria      | Actinobacteria     | Actinomycetales     | Nocardioidaceae       | Kribbella                 |         |
|                                   | 113d585b38c7c9e9265ffdf028a01f71  | 0.52      | 0.04             | 0       | 0       | 4.2E-04       | 0       | 0       | 0        | Bacteria       | Actinobacteria      | Actinobacteria     | Actinomycetales     | Promicromonosporaceae | Promicromonospora         |         |
|                                   | 286264c38a5b581097a4cdd5458ab769  | 0.52      | 0.05             | 3.4E-04 | 1.3E-03 | 8.8E-04       | 0       | 0       | 0        | Bacteria       | Actinobacteria      | Actinobacteria     | Actinomycetales     | Pseudonocardiaeae     | Amycolatopsis             |         |
|                                   | 6d80e3c98883ee1b292e9477f139a60a  | 0.57      | 0.025            | 0       | 2.0E-03 | 3.3E-03       | 0       | 0       | 7.8E-05  | Bacteria       | Actinobacteria      | Actinobacteria     | Actinomycetales     | Streptomycetaceae     | Streptomyces              | lanatus |
|                                   | 832cb36700785dcd8d1f9a2c75160d59  | 0.76      | 0.02             | 4.1E-03 | 4.6E-03 | 4.9E-03       | 0       | 4.2E-04 | 1.6E-03  | Bacteria       | Actinobacteria      | Actinobacteria     | Actinomycetales     | Streptomycetaceae     | Streptomyces              |         |
|                                   | 19bb331bf045e1a15c99b8e35450cf    | 0.55      | 0.035            | 8.8E-04 | 1.4E-03 | 5.1E-04       | 0       | 1.7E-04 | 0        | Bacteria       | Actinobacteria      | Actinobacteria     | Actinomycetales     |                       |                           |         |
|                                   | 5ba5704eb8bd01e7f620837413b7cce   | 0.52      | 0.045            | 2.4E-04 | 8.5E-04 | 2.2E-04       | 0       | 0       | 0        | Bacteria       | Actinobacteria      | Actinobacteria     | Actinomycetales     |                       |                           |         |
|                                   | da4a24c4f1b7ccaf1f416243d6701f04  | 0.52      | 0.05             | 0       | 0       | 2.7E-04       | 0       | 0       | 0        | Bacteria       | Actinobacteria      | Actinobacteria     | Micrococcales       |                       |                           |         |
|                                   | a3f3934a2a2c396a9db1469b32c3003db | 0.52      | 0.035            | 0       | 6.5E-04 | 4.9E-04       | 0       | 0       | 0        | Bacteria       | Actinobacteria      | Thermoleophilii    | Gaillaeaceae        | Gaillaeaceae          |                           |         |
|                                   | 9c340c160b820c8ae4514e3820f91c9   | 0.58      | 0.03             | 0       | 1.2E-03 | 5.9E-04       | 0       | 0       | 0        | Bacteria       | Actinobacteria      | Thermoleophilii    | Solirubrobacterales | Patulibacteraceae     |                           |         |
|                                   | 7f983d5797855310aca32018752605d   | 0.58      | 0.03             | 0       | 2.6E-04 | 6.8E-04       | 0       | 0       | 0        | Bacteria       | Actinobacteria      | Thermoleophilii    | Solirubrobacterales |                       |                           |         |
|                                   | 34fa12dfb373a1e0e8d5ac3b648e85ed  | 0.52      | 0.04             | 5.9E-04 | 0       | 2.9E-04       | 0       | 0       | 0        | Bacteria       | Bacteroidetes       | Saprospirae        | Saprospirales       | Chitinophagaceae      | Chitinophaga              |         |
|                                   | cc6eaf475adfd6d911b2d8c7a9a75a34  | 0.60      | 0.02             | 1.4E-03 | 2.0E-04 | 1.5E-04       | 2.0E-04 | 0       | 0        | Bacteria       | Bacteroidetes       | Saprospirae        | Saprospirales       | Chitinophagaceae      | Niastella                 |         |
|                                   | 201c9ec69d3c9041bb4c1c88817ebd2c3 | 0.58      | 0.02             | 0       | 1.1E-03 | 7.6E-04       | 0       | 0       | 0        | Bacteria       | Bacteroidetes       | Saprospirae        | Saprospirales       | Chitinophagaceae      |                           |         |
|                                   | d71fa1946202725a8d26186d6bc0dc9c  | 0.52      | 0.035            | 0       | 1.3E-04 | 4.9E-04       | 0       | 0       | 0        | Bacteria       | Bacteroidetes       | Saprospirae        | Saprospirales       | Chitinophagaceae      |                           |         |
|                                   | a117969a926db00336f144b9c94db95   | 0.52      | 0.04             | 3.9E-04 | 3.3E-04 | 3.2E-04       | 0       | 0       | 0        | Bacteria       | Bacteroidetes       | Saprospirae        | Saprospirales       | Chitinophagaceae      |                           |         |
|                                   | 3d34ace67e97b943c8d4f7a90e493b6e  | 0.67      | 0.005            | 7.8E-04 | 1.7E-03 | 1.5E-03       | 0       | 2.0E-04 | 0        | Bacteria       | Bacteroidetes       | Cytophagia         | Cytophagales        | Cytophagaceae         |                           |         |
|                                   | 15ad768dcbde591ede5271d32e1c493e  | 0.63      | 0.04             | 7.8E-04 | 3.9E-04 | 9.3E-04       | 0       | 1.7E-04 | 2.3E-04  | Bacteria       | Bacteroidetes       | Cytophagia         | Cytophagales        | Cytophagaceae         |                           |         |
|                                   | 38cf7ab9612a05fae726fcf961a1fd7c  | 0.57      | 0.04             | 4.7E-03 | 2.0E-03 | 5.6E-04       | 2.0E-04 | 0       | 0        | Bacteria       | Bacteroidetes       | Cytophagia         | Cytophagales        | Cytophagaceae         |                           |         |
|                                   | 6b94c1e0414c0e959cd0a2be8d84c4db  | 0.60      | 0.05             | 6.4E-04 | 4.6E-04 | 8.6E-04       | 0       | 9.8E-05 | 1.6E-04  | Bacteria       | Bacteroidetes       | Cytophagia         | Cytophagales        | Cytophagaceae         |                           |         |
|                                   | dfb6dd578dcfd219ef3f6b04ab4bd1d3  | 0.58      | 0.03             | 4.9E-05 | 5.9E-04 | 5.9E-04       | 0       | 0       | 0        | Bacteria       | Chloroflexi         | TK10               |                     |                       |                           |         |
|                                   | 95fd02b64a31ed3b9f31a01f2196b30   | 0.63      | 0.01             | 2.0E-04 | 0       | 1.4E-03       | 0       | 0       | 0        | Bacteria       | Gemmatimonadetes    | Gemm-1             |                     |                       |                           |         |
|                                   | 28059678966c19f8e1314807f64e4a59  | 0.58      | 0.02             | 0       | 3.3E-04 | 3.9E-04       | 0       | 0       | 0        | Bacteria       | Gemmatimonadetes    | Gemmatimonadetes   | Ellin5290           |                       |                           |         |
|                                   | ece4589880c25baeab07b7890cfc05ec  | 0.52      | 0.045            | 4.9E-04 | 0       | 5.1E-04       | 0       | 0       | 0        | Bacteria       | Gemmatimonadetes    | Gemmatimonadetes   | Ellin5290           |                       |                           |         |
|                                   | aa806084c26eac8a39c22969ede199c   | 0.63      | 0.015            | 9.8E-04 | 3.3E-03 | 6.1E-04       | 0       | 0       | 0        | Bacteria       | Nitrospirae         | Nitrospira         | Nitrospirales       | Nitrospiraceae        | Nitrospira                |         |
|                                   | 996e6b9a589b70947d0c2ffa23d45c9   | 0.52      | 0.05             | 0       | 7.8E-04 | 5.9E-04       | 0       | 0       | 0        | Bacteria       | Nitrospirae         | Nitrospira         | Nitrospirales       | Nitrospiraceae        | Nitrospira                |         |
| 88bf884a2f3a396f1f27016c435f3c1   | 0.52                              | 0.05      | 0                | 0       | 6.1E-04 | 0             | 0       | 0       | Bacteria | Planctomycetes | Phycisphaerae       | WD2101             |                     |                       |                           |         |
| ef9b0d14f26e38f0f0ce146da8f3dc8d4 | 0.62                              | 0.015     | 6.4E-04          | 6.5E-04 | 4.4E-04 | 0             | 4.9E-05 | 0       | Bacteria | Planctomycetes | Planctomycetia      | Gemmatales         | Isoosphaeraeae      | Singulisphaera        |                           |         |
| 190321d4c32176dbb9d83d860a3c3616  | 0.58                              | 0.01      | 0                | 0       | 5.6E-04 | 0             | 0       | 0       | Bacteria | Planctomycetes | Planctomycetia      | Pirellulales       | Pirellulaceae       |                       |                           |         |
| 41d345a787b2c4404a88b1703611b72   | 0.63                              | 0.005     | 1.2E-03          | 5.1E-03 | 6.6E-04 | 0             | 0       | 0       | Bacteria | Proteobacteria | Alphaproteobacteria | Ellin329           |                     |                       |                           |         |
| 078c732b9bfbac9f087fcd44a4e467    | 0.50                              | 0.045     | 1.1E-03          | 0       | 1.6E-03 | 0             | 1.7E-04 | 0       | Bacteria | Proteobacteria | Alphaproteobacteria | Rhizobiales        | Bradyrhizobiaceae   | Bradyrhizobium        |                           |         |
| 33f4d454253b9038b04dc90d9902d0dc  | 0.68                              | 0.015     | 1.3E-03          | 2.2E-03 | 8.6E-04 | 0             | 2.4E-05 | 0       | Bacteria | Proteobacteria | Alphaproteobacteria | Rhizobiales        | Hyphomicrobiaceae   | Pedomicrobium         |                           |         |
| 6500567d8c9257d572f6fa3c0db246f9e | 0.52                              | 0.03      | 2.2E-03          | 0       | 2.1E-03 | 0             | 0       | 0       | Bacteria | Proteobacteria | Alphaproteobacteria | Rhizobiales        | Hyphomicrobiaceae   | Rhodopanes            |                           |         |
| beba1f196b8c43f72b5b3dcfd2ad8c8a  | 0.52                              | 0.045     | 1.7E-03          | 2.0E-03 | 2.1E-03 | 0             | 0       | 0       | Bacteria | Proteobacteria | Alphaproteobacteria | Rhizobiales        | Hyphomicrobiaceae   | Rhodopanes            |                           |         |
| ad0cc44c4a3978fcb9b60772a73825    | 0.57                              | 0.05      | 1.9E-03          | 0       | 2.0E-03 | 7.3E-04       | 0       | 7.0E-04 | Bacteria | Proteobacteria | Alphaproteobacteria | Rhizobiales        | Hyphomicrobiaceae   | Rhodopanes            |                           |         |
| bsaf408b866592de349a9805c38bee36  | 0.74                              | 0.005     | 6.8E-04          | 2.6E-04 | 1.1E-03 | 1.5E-04       | 0       | 1.2E-04 | Bacteria | Proteobacteria | Alphaproteobacteria | Rhizobiales        | Rhodobiaceae        | Ajiffella             |                           |         |
| ac68934aa4cf691eed9796809fd4b1    | 0.79                              | 0.005     | 5.9E-04          | 3.3E-04 | 1.5E-03 | 2.9E-04       | 0       | 0       | Bacteria | Proteobacteria | Alphaproteobacteria | Rhizobiales        |                     |                       |                           |         |
| 540bd048de0e54693e7e4655ca196ec0  | 0.52                              | 0.025     | 7.8E-04          | 0       | 3.4E-04 | 0             | 0       | 0       | Bacteria | Proteobacteria |                     |                    |                     |                       |                           |         |

|                                   |      |       |         |         |         |         |         |         |            |                 |                     |                     |                     |                              |                                   |  |  |
|-----------------------------------|------|-------|---------|---------|---------|---------|---------|---------|------------|-----------------|---------------------|---------------------|---------------------|------------------------------|-----------------------------------|--|--|
| 52ef4e5fd1f06bd01003c5f0591376b1  | 0.68 | 0.005 | 7.3E-04 | 5.3E-03 | 7.6E-04 | 0       | 0       | 0       | Bacteria   | Proteobacteria  | Gammaproteobacteria | Thiotrichales       | Piscirickettsiaceae |                              |                                   |  |  |
| 40556136a0a6807e70d54393cd79a3c   | 0.84 | 0.005 | 4.9E-03 | 1.5E-02 | 6.1E-03 | 1.3E-03 | 1.4E-03 | 0       | Bacteria   | Proteobacteria  | Gammaproteobacteria | Xanthomonadales     | Sinobacteraceae     | <i>Steroidobacter</i>        |                                   |  |  |
| a3b256c2e0b9dc498975725b75f5c60   | 0.82 | 0.005 | 2.7E-03 | 8.3E-03 | 2.6E-03 | 0       | 0       | 0       | Bacteria   | Proteobacteria  | Gammaproteobacteria | Xanthomonadales     | Sinobacteraceae     | <i>Steroidobacter</i>        |                                   |  |  |
| c164f0d025502e5963286a9322833a0   | 0.96 | 0.005 | 4.8E-03 | 6.4E-03 | 6.2E-03 | 0       | 1.2E-04 | 0       | Bacteria   | Proteobacteria  | Gammaproteobacteria | Xanthomonadales     | Sinobacteraceae     | <i>Steroidobacter</i>        |                                   |  |  |
| c6fbb06b184909a507be2c2edaccd01c  | 0.73 | 0.005 | 1.1E-03 | 7.8E-04 | 9.8E-04 | 0       | 0       | 0       | Bacteria   | Proteobacteria  | Gammaproteobacteria | Xanthomonadales     | Sinobacteraceae     | <i>Steroidobacter</i>        |                                   |  |  |
| da9ae48df4bb540a1586c06e84aae17   | 0.58 | 0.02  | 5.9E-04 | 1.6E-03 | 1.9E-03 | 0       | 0       | 0       | Bacteria   | Proteobacteria  | Gammaproteobacteria | Xanthomonadales     | Sinobacteraceae     | <i>Steroidobacter</i>        |                                   |  |  |
| e98349f8b3c7732ea4c148ac11686545  | 0.74 | 0.005 | 3.3E-03 | 6.1E-03 | 4.1E-03 | 8.3E-04 | 3.9E-04 | 0       | Bacteria   | Proteobacteria  | Gammaproteobacteria | Xanthomonadales     | Sinobacteraceae     |                              |                                   |  |  |
| df250ba5a282758ae2885d854c3c4c2   | 0.52 | 0.045 | 0       | 0       | 1.2E-03 | 0       | 0       | 0       | Bacteria   | Proteobacteria  | Gammaproteobacteria | Xanthomonadales     | Sinobacteraceae     |                              |                                   |  |  |
| 42adec8e37519fa90a455c14e2725a0c  | 0.52 | 0.04  | 2.9E-04 | 0       | 3.7E-04 | 0       | 0       | 0       | Bacteria   | Proteobacteria  | Gammaproteobacteria | Xanthomonadales     | Xanthomonadaceae    | <i>Lysobacter</i>            |                                   |  |  |
| 888c1f97b0da8e8cb364f217ca23818e  | 0.63 | 0.01  | 4.4E-04 | 1.4E-03 | 4.1E-03 | 2.0E-03 | 0       | 0       | Bacteria   | Verrucomicrobia | Spartobacteria      | Othionibacteriales  | Othionibacteraceae  | DA101                        |                                   |  |  |
| 25976640bfc999b49f17ca08410d77ac  | 0.66 | 0.015 | 2.4E-03 | 1.5E-03 | 3.6E-03 | 7.8E-04 | 0       | 0       | Bacteria   | Verrucomicrobia | Spartobacteria      | Othionibacteriales  | Othionibacteraceae  | DA101                        |                                   |  |  |
| ee9c5a8f692f7c2b42c86905be38c2e   | 0.58 | 0.02  | 0       | 1.4E-03 | 4.9E-03 | 0       | 0       | 0       | Bacteria   | Verrucomicrobia | Spartobacteria      | Othionibacteriales  | Othionibacteraceae  | DA101                        |                                   |  |  |
| 3bde92b6a319f4c6440e2cedbda93254  | 0.52 | 0.05  | 4.4E-04 | 0       | 7.1E-04 | 0       | 0       | 0       | Bacteria   | Verrucomicrobia | Spartobacteria      | Othionibacteriales  | Othionibacteraceae  | DA101                        |                                   |  |  |
| 8a8a97e6b7d0f7046388c72d994e6332  | 0.54 | 0.05  | 0       | 2.4E-03 | 6.4E-03 | 2.5E-03 | 0       | 0       | Bacteria   | Verrucomicrobia | Spartobacteria      | Othionibacteriales  | Othionibacteraceae  | DA101                        |                                   |  |  |
| 55b3e0d44c327b6e23a12858516dd6    | 0.52 | 0.045 | 4.9E-05 | 1.3E-04 | 9.8E-05 | 0       | 0       | 0       | Unassigned |                 |                     |                     |                     |                              |                                   |  |  |
| 119d712dd230b4ae4af1b1c79714e04d  | 0.45 | 0.05  | 0       | 5.2E-04 | 2.7E-04 | 0       | 0       | 0       | Unassigned |                 |                     |                     |                     |                              |                                   |  |  |
| f2a80ca7a1f03c84fe11bfbd8c77604   | 0.54 | 0.05  | 0       | 0       | 0       | 4.2E-04 | 7.8E-05 | 0       | Bacteria   | Acidobacteria   | Chloracidobacteria  | RB41                | Ellin6075           |                              |                                   |  |  |
| 9f6d0ba5232b53de37c3bf70d85d83    | 0.61 | 0.005 | 0       | 0       | 1.5E-04 | 2.2E-03 | 5.6E-04 | 2.0E-04 | Bacteria   | Acidobacteria   | Chloracidobacteria  | RB41                |                     |                              |                                   |  |  |
| cd0aa403916692f64e4d2cbb730cb95   | 0.69 | 0.005 | 0       | 0       | 0       | 1.2E-03 | 1.1E-03 | 5.1E-04 | Bacteria   | Acidobacteria   | Chloracidobacteria  | RB41                |                     |                              |                                   |  |  |
| 55695752bd3ba9b9c1e262b6737f64b97 | 0.54 | 0.03  | 0       | 0       | 0       | 8.1E-04 | 5.5E-04 | 0       | Bacteria   | Acidobacteria   | Acidobacteria-6     | iii1-15             |                     |                              |                                   |  |  |
| 6d719ad12060a828dcf712d2a41b612e  | 0.60 | 0.04  | 2.4E-04 | 0       | 7.6E-04 | 2.9E-04 | 2.6E-03 | 7.0E-04 | Bacteria   | Acidobacteria   | Acidobacteria-6     | iii1-15             |                     |                              |                                   |  |  |
| a54ccadff4f8b94c10f1ccfacc99a5a   | 0.54 | 0.05  | 0       | 0       | 0       | 8.1E-04 | 5.9E-04 | 0       | Bacteria   | Acidobacteria   | Acidobacteria-6     | iii1-15             |                     |                              |                                   |  |  |
| dc4919160d9c1a6cc9b05439c4c8cb    | 0.56 | 0.05  | 0       | 0       | 2.2E-04 | 5.9E-04 | 6.4E-04 | 1.7E-03 | Bacteria   | Acidobacteria   | Acidobacteria-6     | iii1-15             |                     |                              |                                   |  |  |
| b9fccc0f1c5272ff219ee681eb39d58   | 0.57 | 0.05  | 0       | 0       | 3.4E-04 | 2.5E-03 | 2.6E-03 | 6.3E-04 | Bacteria   | Acidobacteria   | Acidobacteria       | Acidobacteriales    | Acidobacteriaceae   | <i>Granulicella</i>          | <i>paludicola</i>                 |  |  |
| 8ee6c4ab30ebefae1d1861564e77f78a  | 0.59 | 0.02  | 0       | 0       | 0       | 0       | 1.7E-03 | 8.2E-04 | Bacteria   | Acidobacteria   | Solibacteres        | Solibacteres        | Solibacteraceae     | <i>Candidatus Solibacter</i> |                                   |  |  |
| 29336d1af7b2359779807a7fbc53f1b8  | 0.54 | 0.04  | 0       | 0       | 0       | 1.5E-04 | 2.0E-04 | 2.7E-04 | Bacteria   | Acidobacteria   | Sva0725             | Sva0725             |                     |                              |                                   |  |  |
| 1839e46bb8e4d01cd6c3fb75a2469389  | 0.54 | 0.035 | 0       | 0       | 0       | 4.9E-05 | 1.5E-04 | 6.3E-04 | Bacteria   | Actinobacteria  | Acidimicrobia       | Acidimicrobiales    | C111                |                              |                                   |  |  |
| 7353297d3e40e11fca6bb9b9a0902a3   | 0.54 | 0.05  | 0       | 0       | 0       | 7.8E-04 | 5.6E-04 | 1.2E-04 | Bacteria   | Actinobacteria  | Acidimicrobia       | Acidimicrobiales    | EB1017              |                              |                                   |  |  |
| b37d61f2081038a5c8e89db3bc36d34c  | 0.64 | 0.01  | 0       | 0       | 0       | 0       | 9.8E-05 | 7.8E-04 | Bacteria   | Actinobacteria  | Acidimicrobia       | Acidimicrobiales    |                     |                              |                                   |  |  |
| ad574a0549476e3fe09be14e6cbee475  | 0.77 | 0.015 | 3.9E-04 | 3.9E-04 | 1.2E-04 | 4.4E-04 | 7.6E-04 | 2.8E-03 | Bacteria   | Actinobacteria  | Actinobacteria      | Actinomycetales     | Cellulomonadaceae   | <i>Cellulomonas</i>          |                                   |  |  |
| c59ae40e809bf890dc57c74a1904      | 0.54 | 0.025 | 0       | 0       | 0       | 0       | 2.2E-04 | 7.8E-04 | Bacteria   | Actinobacteria  | Actinobacteria      | Actinomycetales     | Intrasporangiaceae  | <i>Phycoccus</i>             |                                   |  |  |
| d5c21059586df8b1ad75800d7820db    | 0.58 | 0.05  | 4.4E-04 | 0       | 0       | 6.4E-04 | 6.1E-04 | 3.1E-04 | Bacteria   | Actinobacteria  | Actinobacteria      | Actinomycetales     | Kineosporiaceae     |                              |                                   |  |  |
| 73a2b9e5295f9aa5098040cea1b05d4d  | 0.59 | 0.03  | 0       | 0       | 0       | 0       | 4.4E-04 | 2.5E-03 | Bacteria   | Actinobacteria  | Actinobacteria      | Actinomycetales     | Microbacteriaceae   |                              |                                   |  |  |
| cb3bd0c85ddab92865f11ccd2878632   | 0.64 | 0.01  | 0       | 0       | 0       | 0       | 1.1E-03 | 2.5E-03 | Bacteria   | Actinobacteria  | Actinobacteria      | Actinomycetales     | Nakamurellaceae     |                              |                                   |  |  |
| 1693b72fb96df3a45f67065ef3445042  | 0.64 | 0.015 | 0       | 0       | 0       | 0       | 5.4E-04 | 1.9E-03 | Bacteria   | Actinobacteria  | Actinobacteria      | Actinomycetales     | Nakamurellaceae     |                              |                                   |  |  |
| b40e445e1ad7edc719d9c2805533e7c   | 0.54 | 0.05  | 0       | 0       | 0       | 0       | 4.9E-05 | 8.6E-04 | Bacteria   | Actinobacteria  | Actinobacteria      | Actinomycetales     | Nocardiodaceae      | <i>Nocardioideis</i>         |                                   |  |  |
| 5a78a8936d287d363796fccc0c138d48  | 0.64 | 0.005 | 0       | 0       | 0       | 0       | 5.9E-04 | 1.4E-03 | Bacteria   | Actinobacteria  | Actinobacteria      | Actinomycetales     | Nocardiodaceae      |                              |                                   |  |  |
| b5c586ff266ea4b0929cabe7b6e8329   | 0.59 | 0.02  | 0       | 0       | 0       | 0       | 1.6E-03 | 1.6E-03 | Bacteria   | Actinobacteria  | Actinobacteria      | Actinomycetales     | Nocardiodaceae      |                              |                                   |  |  |
| f7bb60140f3ca1fb648cf0f18b8c636c  | 0.59 | 0.02  | 0       | 0       | 0       | 0       | 5.6E-04 | 9.4E-04 | Bacteria   | Actinobacteria  | Actinobacteria      | Actinomycetales     | Pseudonocardiaceae  | <i>Actinomycetospora</i>     |                                   |  |  |
| 49a1897b3e8a9e1a219716df9d1892f5  | 0.62 | 0.03  | 5.9E-04 | 0       | 0       | 0       | 3.3E-03 | 7.8E-04 | Bacteria   | Actinobacteria  | Actinobacteria      | Actinomycetales     | Pseudonocardiaceae  | <i>Actinomycetospora</i>     |                                   |  |  |
| 4d66ee483deffc2e46c3c5a29ab0261   | 0.54 | 0.04  | 0       | 0       | 0       | 0       | 1.5E-04 | 3.5E-04 | Bacteria   | Actinobacteria  | Actinobacteria      | Actinomycetales     |                     |                              |                                   |  |  |
| 42ba659e0465b5fa83a90c4a10c787c6  | 0.54 | 0.04  | 0       | 0       | 0       | 0       | 1.5E-04 | 3.9E-04 | Bacteria   | Actinobacteria  | Actinobacteria      | Actinomycetales     |                     |                              |                                   |  |  |
| 0222d3a737afa53c94878a023cd1efc   | 0.59 | 0.015 | 0       | 0       | 0       | 0       | 4.6E-04 | 6.3E-04 | Bacteria   | Actinobacteria  | Thermoleophilina    | Gailliales          | Gailliales          |                              |                                   |  |  |
| 748f5e1091680b0ee4428fc49c6ad325  | 0.61 | 0.045 | 1.5E-04 | 0       | 0       | 9.8E-05 | 0       | 6.4E-04 | 1.5E-03    | Bacteria        | Actinobacteria      | Thermoleophilina    | Gailliales          |                              |                                   |  |  |
| b3997a39a2f0f08d316eb5db73755b147 | 0.59 | 0.015 | 0       | 0       | 0       | 0       | 5.4E-04 | 3.1E-04 | Bacteria   | Actinobacteria  | Thermoleophilina    | Solirubrobacterales |                     |                              |                                   |  |  |
| 7591f84c8f089d88efce4b06d7315aa   | 0.59 | 0.02  | 0       | 0       | 0       | 1.1E-03 | 8.3E-04 | 5.1E-04 | Bacteria   | Bacteroidetes   | Saprosirae          | Saprosirales        | Chitinophagaceae    | <i>Niabella</i>              |                                   |  |  |
| d5c5e9e9eb37b67ebd24d82ce5b642    | 0.69 | 0.005 | 0       | 0       | 0       | 1.5E-04 | 6.4E-04 | 9.8E-04 | Bacteria   | Bacteroidetes   | Saprosirae          | Saprosirales        | Chitinophagaceae    |                              |                                   |  |  |
| 0fa8f80e7ba892e2ec52157157d86c55  | 0.64 | 0.015 | 0       | 0       | 0       | 0       | 4.9E-04 | 2.2E-03 | Bacteria   | Bacteroidetes   | Saprosirae          | Saprosirales        | Chitinophagaceae    |                              |                                   |  |  |
| 5c7efb16bc9873225a198caeabf7b6f1  | 0.59 | 0.02  | 0       | 0       | 0       | 0       | 4.6E-04 | 5.5E-04 | Bacteria   | Bacteroidetes   | Saprosirae          | Saprosirales        | Chitinophagaceae    |                              |                                   |  |  |
| 1a7a59e27294f382b06f31afe0f07a54  | 0.62 | 0.025 | 1.5E-04 | 0       | 0       | 1.5E-03 | 2.2E-04 | 5.1E-04 | Bacteria   | Bacteroidetes   | Saprosirae          | Saprosirales        | Chitinophagaceae    |                              |                                   |  |  |
| fb6aa31e5e1aa1e73cebe053ad8121cb  | 0.54 | 0.03  | 0       | 0       | 0       | 0       | 2.9E-04 | 1.1E-03 | 0          | Bacteria        | Bacteroidetes       | Saprosirae          | Saprosirales        | Chitinophagaceae             |                                   |  |  |
| 8b2e4b08b8e925fbd772143f712d16e   | 0.54 | 0.04  | 0       | 0       | 0       | 0       | 1.7E-04 | 1.9E-03 | 0          | Bacteria        | Bacteroidetes       | Saprosirae          | Saprosirales        | Chitinophagaceae             |                                   |  |  |
| 291713113d06d0a68de25a552b310a23  | 0.54 | 0.045 | 0       | 0       | 0       | 0       | 5.9E-04 | 1.1E-03 | 0          | Bacteria        | Bacteroidetes       | Saprosirae          | Saprosirales        | Chitinophagaceae             |                                   |  |  |
| 3676f7251212b17db73cebc471ac226a  | 0.60 | 0.05  | 0       | 0       | 3.2E-04 | 9.8E-05 | 6.1E-04 | 8.2E-04 | 0          | Bacteria        | Bacteroidetes       | Saprosirae          | Saprosirales        | Chitinophagaceae             |                                   |  |  |
| 3b9e945028fba801bf5d7a8caf5257    | 0.54 | 0.05  | 0       | 0       | 0       | 2.4E-04 | 4.9E-05 | 7.8E-05 | 0          | Bacteria        | Bacteroidetes       | Saprosirae          | Saprosirales        | Chitinophagaceae             |                                   |  |  |
| a41d967e97b5a6e331173ba846605d9   | 0.56 | 0.05  | 0       | 1.6E-03 | 0       | 2.9E-03 | 5.6E-04 | 3.9E-04 | 0          | Bacteria        | Bacteroidetes       | Saprosirae          | Saprosirales        | Chitinophagaceae             |                                   |  |  |
| 5e301f77b781828642e00ae5c6719     | 0.61 | 0.035 | 0       | 0       | 1.2E-04 | 0       | 4.9E-05 | 9.3E-04 | 4.3E-04    | 0               | Bacteria            | Bacteroidetes       | Saprosirae          | Saprosirales                 | Chitinophagaceae                  |  |  |
| 0a4e4c32fe6701fb6bba23b29656279   | 0.59 | 0.035 | 0       | 0       | 0       | 2.0E-04 | 5.6E-04 | 1.1E-03 | 0          | Bacteria        | Bacteroidetes       | Cytophagia          | Cytophagales        | Adhaeribacter                |                                   |  |  |
| 24aa511e07dc7d5479f64bbf076b5f4   | 0.54 | 0.05  | 0       | 0       | 0       | 0       | 1.1E-03 | 3.5E-04 | 0          | Bacteria        | Bacteroidetes       | Cytophagia          | Cytophagales        | Adhaeribacter                |                                   |  |  |
| 23b870d0574883d71d3be8fbb272791   | 0.63 | 0.015 | 9.8E-05 | 0       | 0       | 0       | 3.2E-04 | 1.7E-03 | 0          | Bacteria        | Bacteroidetes       | Cytophagia          | Cytophagales        | Cytophagaceae                |                                   |  |  |
| 8aa440a88e8c2668f734d2f178ee17ca  | 0.54 | 0.03  | 0       | 0       | 0       | 2.0E-04 | 1.1E-03 | 0       | 0          | Bacteria        | Bacteroidetes       | Flavobacteriia      | Flavobacteriales    | Flavobacterium               |                                   |  |  |
| 4caf855972af2edefc5138caf80decc   | 0.57 | 0.045 | 3.9E-04 | 0       | 0       | 0       | 2.1E-03 | 4.7E-04 | 0          | Bacteria        | Bacteroidetes       | Sphingobacteriia    | Sphingobacteriales  | Sphingobacteriaceae          |                                   |  |  |
| 0dfb5cdacfc45d7315037568f5da372   | 0.59 | 0.02  | 0       | 0       | 0       | 0       | 2.2E-04 | 2.0E-04 | 0          | Bacteria        | Bacteroidetes       | Sphingobacteriia    | Sphingobacteriales  |                              |                                   |  |  |
| da150f3d5912ac280b5f48472c530e    | 0.73 | 0.005 | 0       | 0       | 0       | 0       | 5.3E-03 | 2.7E-03 | 0          | Bacteria        | Chlamydiae          | Chlamydia           | Chlamydiales        | Rhabdochlamydiaceae          | <i>Candidatus Rhabdochlamydia</i> |  |  |
| e77e7ca09de4e691738c41f6d72c6fa7  | 0.78 | 0.005 | 2.0E-04 | 0       | 1.2E-04 | 1.5E-03 | 1.4E-03 | 2.5E-03 | 0          | Bacteria        | Chloroflexi         | Ellin6529           |                     |                              |                                   |  |  |
| 8b0ba802e09422879ab78f9b6dd5f7de  | 0.54 | 0.05  | 0       | 0       | 0       | 2.9E-04 | 1.7E-04 | 7.8E-05 | 0          | Bacteria        | Gemmatimonadetes    | Gemm-5              |                     |                              |                                   |  |  |
| 4ee0e045d602a14ff24ae724d80c2eb5  | 0.59 | 0.025 | 0       | 0       | 0       | 0       | 6.4E-04 | 2.7E-04 | 0          | Bacteria        | Gemmatimonadetes    | Gemmatimonadetes    | Ellin5290           |                              |                                   |  |  |
| a8e8ce2197d3947a0769abfc507cf46c  | 0.58 | 0.04  | 0       | 2.4E-05 | 0       | 2.9E-04 | 2.9E-04 | 3.9E-04 | 0          | Bacteria        | Planctomycetes      | Planctomycetia      | Gemmatataceae       | <i>Gemmata</i>               |                                   |  |  |
| 73cd0b59d3c1ee6c6470bd93cc007a2   | 0.58 | 0.05  | 0       | 0       | 4.9E-05 | 1.3E-03 | 1.7E-04 | 2.3E-04 | 0          | Bacteria        | Planctomycetes      | Planctomycetia      | Gemmatataceae       |                              |                                   |  |  |
| 0126dc4bf3a1b55455aaef3b3deb18    | 0.59 | 0.03  | 0       | 0       | 0       | 0       | 3.9E-04 | 8.6E-04 | 0          | Bacteria        | Planctomycetes      | Planctomycetia      | Planctomycetales    | Planctomycetaceae            | <i>Planctomyces</i>               |  |  |
| 141596f178501c00b0fee1ac85cf3     | 0.84 | 0.005 | 0       | 0       | 0       | 5.2E-03 | 9.8E-04 | 7.4E-04 | 0          | Bacteria        | Proteobacteria      | Alphaproteobacteria | Rhizobiales         | Hyphomicrobiaceae            | <i>Rhodopanes</i>                 |  |  |
| 6598429447ed4906911ed1b36f9c17ca  | 0.59 | 0.02  | 0       | 0       | 0       | 0       | 2.3E-03 | 1.4E-03 | 0          | Bacteria        | Proteobacteria      | Alphaproteobacteria | Rhizobiales         | Hyphomicrobiaceae            | <i>Rhodopanes</i>                 |  |  |
| 046be10411d89503f08392b6f352e5f   | 0.54 | 0.04  | 0       | 0       | 0       | 4.9E-04 | 6.8E-04 | 0       | 0          | Bacteria        | Proteobacteria      | Alphaproteobacteria | Rhizobiales         | Hyphomicrobiaceae            | <i>Rhodopanes</i>                 |  |  |
| a9a07cb1160266f09cf49a5d88b8c9a   | 0.54 | 0.045 | 0       | 0       | 0       | 0       | 4.9E-04 | 4.3E-04 | 0          | Bacteria        | Proteobacteria      | Alphaproteobacteria | Rhizobiales         | Hyphomicrobiaceae            | <i>Rhodopanes</i>                 |  |  |
| 1433f1f6e3d4d3684e9185733a8c7be7  | 0.68 | 0.01  | 1.5E-04 | 0       | 0       | 5.8E-03 | 8.1E-04 | 6.3E-04 | 0          | Bacteria        | Proteobacteria      | Alphaproteobacteria | Rhizobiales         | Methylocystaceae             |                                   |  |  |
| 16357c104069b5c62302e913480ce46   | 0.5  |       |         |         |         |         |         |         |            |                 |                     |                     |                     |                              |                                   |  |  |

|  |                                  |      |       |   |   |         |   |         |         |          |                 |                  |                    |                     |                      |  |
|--|----------------------------------|------|-------|---|---|---------|---|---------|---------|----------|-----------------|------------------|--------------------|---------------------|----------------------|--|
|  | 22d0ce457b2606ee94ce5ead360574bc | 0.61 | 0.035 | 0 | 0 | 2.2E-04 | 0 | 1.3E-03 | 1.5E-03 | Bacteria | Verrucomicrobia | Verrucomicrobiae | Verrucomicrobiales | Verrucomicrobiaceae | <i>Luteolibacter</i> |  |
|  | fba4613944482bd49c4f9cbe2f6c02a4 | 0.59 | 0.02  | 0 | 0 | 0       | 0 | 3.2E-04 | 2.3E-04 | Bacteria | WS3             | PRR-12           | Sediment-1         |                     |                      |  |
