# Supplementary material for: Invasive vegetation affects amphibian skin microbiota and body condition
Source: PeerJ journal article supplement (doi:10.7717/peerj.8549), 2020-02-19
Supplement: PeerJ_Supp_updated.zip [file PeerJ_Supp_updated.zip]

Supplemental Table Captions

Table S1: *Batrachoseps attenuatus* microhabitat soil microbiota indicator species analysis results. ASVs associated with either *Eucalyptus* or *Quercus* habitat soils are presented. For each ASV the LDA statistic (effect size), p-value, average relative abundance at each site, and taxonomy is presented. Relative abundance values are colored based on value from 0 (white) to 0.1 (black).

Table S2: *Batrachoseps attenuatus* skin microbiota indicator species analysis results. ASVs associated with salamanders presiding in either *Eucalyptus* or *Quercus* habitat are presented. For each ASV the LDA statistic (effect size), p-value, average relative abundance at each site, and taxonomy is presented. Relative abundance values are colored based on value from 0 (white) to 0.1 (black).
