# Supplementary material for: Invasive vegetation affects amphibian skin microbiota and body condition
Source: PeerJ journal article supplement (doi:10.7717/peerj.8549), 2020-02-19
Supplement: PeerJ_Supp_updated.zip [file PeerJ_Supp_updated.zip]

| Assignment | ASV ID                             | LDA stats | Eucalyptus Sites |         |         | Quercus sites |         |         | N3      | Kingdom    | Phylum         | Class               | Taxonomy            |                     |                           |            |
|------------|------------------------------------|-----------|------------------|---------|---------|---------------|---------|---------|---------|------------|----------------|---------------------|---------------------|---------------------|---------------------------|------------|
|            |                                    |           | E1               | E2      | E3      | N1            | N2      | Order   |         |            |                |                     | Family              | Genus               | Species                   |            |
| Eucalyptus | df0534866a33108ad27b3709bfe8       | 0.63      | 0.005            | 1.2E-03 | 3.6E-04 | 5.5E-04       | 9.8E-05 | 7.8E-05 | 0       | Bacteria   | Acidobacteria  | Acidobacteria       | Acidobacteriales    | Acidobacteriaceae   |                           |            |
|            | e299476d14203066a5c966011252116    | 0.62      | 0.015            | 9.8E-04 | 5.6E-05 | 1.0E-03       | 0       | 2.0E-05 | 0       | Bacteria   | Acidobacteria  | Acidobacteria       | Acidobacteriales    | Acidobacteriaceae   |                           |            |
|            | b379b1521d1a107507e12b3c376067b0   | 0.56      | 0.03             | 0       | 3.6E-04 | 1.0E-03       | 0       | 3.9E-05 | 0       | Bacteria   | Acidobacteria  | Acidobacteria       | iii1-8              | DS-18               |                           |            |
|            | 15d0c75dbd04705f4d5d4d770a59c8f00  | 0.65      | 0.005            | 2.0E-04 | 7.0E-04 | 1.2E-03       | 0       | 0       | 0       | Bacteria   | Actinobacteria | Acidimicrobia       | Acidimicrobiales    | EB1017              |                           |            |
|            | 5f5dc2adbed265a4e4db64483f3704     | 0.50      | 0.025            | 9.8E-05 | 1.4E-04 | 4.6E-04       | 0       | 0       | 0       | Bacteria   | Actinobacteria | Acidimicrobia       | Acidimicrobiales    | Microthricaceae     |                           |            |
|            | fcdee861c3a5b2ef476eb7d3ab1d606c   | 0.45      | 0.05             | 2.0E-04 | 5.9E-04 | 7.1E-05       | 0       | 3.9E-05 | 0       | Bacteria   | Actinobacteria | Actinobacteria      | Actinomycetales     | Microbacteriaceae   | Microbacterium            |            |
|            | 20e7da7880473ead42573519350147     | 0.57      | 0.005            | 3.2E-03 | 6.8E-03 | 5.0E-04       | 0       | 0       | 0       | Bacteria   | Actinobacteria | Actinobacteria      | Actinomycetales     | Micrococccaceae     |                           |            |
|            | 477c949c1769999ae63444acaa470a     | 0.45      | 0.05             | 7.4E-04 | 4.2E-04 | 2.3E-04       | 0       | 7.8E-05 | 0       | Bacteria   | Actinobacteria | Actinobacteria      | Actinomycetales     | Nocardioidaceae     | Nocardioides              |            |
|            | 380325f892a9f8b6ee2e1b6de8436d4    | 0.53      | 0.025            | 1.1E-03 | 4.5E-04 | 2.5E-04       | 0       | 0       | 0       | Bacteria   | Actinobacteria | Actinobacteria      | Actinomycetales     | Nocardioidaceae     |                           |            |
|            | 7facc6b5676a2c40636da004a18ec5a0   | 0.50      | 0.05             | 0       | 2.8E-04 | 1.1E-03       | 0       | 1.6E-04 | 0       | Bacteria   | Actinobacteria | Actinobacteria      | Actinomycetales     | Nocardioidaceae     |                           |            |
|            | 113b318d23356092ddae70f544df4718   | 0.46      | 0.035            | 7.8E-05 | 2.2E-04 | 3.6E-04       | 0       | 0       | 0       | Bacteria   | Actinobacteria | Actinobacteria      | Actinomycetales     | Pseudonocardiaceae  | Pseudonocardia            |            |
|            | 6ced708f78dca8c0dd166df25149f6b6   | 0.46      | 0.035            | 5.9E-05 | 2.5E-04 | 5.7E-04       | 0       | 0       | 0       | Bacteria   | Actinobacteria | Thermoleophilina    | Solirubrobacterales | Chitinophagaceae    |                           |            |
|            | 4479830df8a883aa2997024fad88b52    | 0.46      | 0.045            | 5.9E-04 | 0       | 8.2E-04       | 0       | 0       | 0       | Bacteria   | Bacteroidetes  | Saprospirae         | Saprospirales       | Chitinophagaceae    |                           |            |
|            | e007858c3abd7a15cf8e8930820a689e   | 0.53      | 0.015            | 2.9E-04 | 6.1E-04 | 2.8E-04       | 0       | 0       | 0       | Bacteria   | Bacteroidetes  | Flavobacteria       | Flavobacteriales    | Flavobacteriaceae   | Epilithonimonas           |            |
|            | 5984c840c5cdeab6540d4863e81270a    | 0.58      | 0.05             | 2.1E-03 | 8.9E-04 | 6.8E-04       | 4.9E-05 | 4.7E-04 | 0       | Bacteria   | Bacteroidetes  | Sphingobacteria     | Sphingobacteriales  | Sphingobacteriaceae | Pedobacter                |            |
|            | ad5d17028975c96a543bc1bdeea4692f4  | 0.76      | 0.005            | 8.3E-02 | 2.1E-02 | 2.2E-02       | 0       | 1.2E-04 | 9.8E-05 | Bacteria   | Chlamydiae     | Chlamydia           | Chlamydiales        | Chlamydiaceae       |                           |            |
|            | 411512cc5d5f7a557daeffbfcc0cd      | 0.42      | 0.045            | 0.0E+00 | 5.6E-05 | 1.1E-04       | 0       | 0       | 0       | Bacteria   | Planctomycetes | Planctomycetia      | Pirellulales        | Pirellulaceae       |                           |            |
|            | 37167b5527b024b9359874984e5e0adf   | 0.50      | 0.02             | 1.2E-04 | 1.4E-04 | 6.6E-04       | 0       | 0       | 0       | Bacteria   | Proteobacteria | Alphaproteobacteria | Rhizobiales         | Hyphomicrobiaceae   | Hyphomicrobium            |            |
|            | 33f454253b9038b04dc90cd9902d0dc    | 0.46      | 0.035            | 2.3E-04 | 3.4E-04 | 4.3E-04       | 0       | 0       | 0       | Bacteria   | Proteobacteria | Alphaproteobacteria | Rhizobiales         | Hyphomicrobiaceae   | Pedomicrobium             |            |
|            | 00e5c35e8de89de75ef2771ee627117f   | 0.55      | 0.015            | 8.0E-04 | 3.9E-04 | 2.8E-03       | 0       | 6.3E-04 | 0       | Bacteria   | Proteobacteria | Alphaproteobacteria | Rhizobiales         | Hyphomicrobiaceae   | Rhodoplanes               |            |
|            | 13d713ae52a5bf5fda3b92add632665    | 0.46      | 0.03             | 1.2E-04 | 1.4E-04 | 1.4E-04       | 0       | 0       | 0       | Bacteria   | Proteobacteria | Alphaproteobacteria | Rhizobiales         | Hyphomicrobiaceae   |                           |            |
|            | 8f496bedd06ec30e808cdad1970316c22a | 0.42      | 0.045            | 1.6E-04 | 1.1E-04 | 2.1E-04       | 0       | 0       | 0       | Bacteria   | Proteobacteria | Alphaproteobacteria | Rhizobiales         | Methylobacteriaceae | Methylobacterium          | adhesivum  |
|            | a552c538964597136b53d5f7881f41e1   | 0.60      | 0.01             | 8.2E-04 | 1.1E-04 | 1.5E-03       | 0       | 0       | 0       | Bacteria   | Proteobacteria | Alphaproteobacteria | Rhizobiales         | Methylocystaceae    |                           |            |
|            | 143331f8e6343684c9185733a8c7be7c   | 0.68      | 0.025            | 2.7E-04 | 2.0E-04 | 2.3E-03       | 2.0E-03 | 2.3E-04 | 7.3E-05 | Bacteria   | Proteobacteria | Alphaproteobacteria | Rhizobiales         | Methylocystaceae    |                           |            |
|            | 980978a371c5942be087bf324c5e2f3    | 0.57      | 0.005            | 7.2E-04 | 1.7E-04 | 3.0E-04       | 0       | 0       | 0       | Bacteria   | Proteobacteria | Alphaproteobacteria | Rhodospirillales    | Acetobacteraceae    | Acidocella                |            |
|            | 82254e7f9ad42d17f33755c21748e29    | 0.53      | 0.025            | 0       | 2.5E-04 | 2.0E-04       | 0       | 0       | 4.9E-05 | Bacteria   | Proteobacteria | Alphaproteobacteria | Rhodospirillales    | Rhodospirillaceae   |                           |            |
|            | 365efbf1a370ffdb233f0dc8e22cab     | 0.63      | 0.01             | 2.9E-03 | 9.8E-04 | 5.7E-04       | 0       | 5.9E-05 | 3.2E-04 | Bacteria   | Proteobacteria | Alphaproteobacteria | Sphingomonadales    | Sphingomonadaceae   | Blastomonas               |            |
|            | 26dcde51f936fa6c6f200b49079161     | 0.71      | 0.005            | 6.5E-04 | 1.5E-03 | 6.3E-03       | 0       | 0       | 0       | Bacteria   | Proteobacteria | Alphaproteobacteria | Sphingomonadales    | Sphingomonadaceae   | Novosphingobium           |            |
|            | 42630c98d41bbf95b25a504084602f221  | 0.46      | 0.045            | 7.0E-04 | 1.4E-04 | 0             | 0       | 0       | 0       | Bacteria   | Proteobacteria | Alphaproteobacteria | Sphingomonadales    | Sphingomonadaceae   | Sphingomonas              | wittichii  |
|            | 2899612d084df7709cd7a2973a7121f6   | 0.46      | 0.03             | 4.7E-04 | 1.4E-04 | 1.4E-04       | 0       | 0       | 0       | Bacteria   | Proteobacteria | Betaproteobacteria  | Burkholderiales     |                     |                           |            |
|            | 999e7806b23a27b7759c33ac170411f7   | 0.64      | 0.005            | 3.9E-04 | 9.2E-04 | 1.7E-03       | 0       | 1.4E-04 | 0       | Bacteria   | Proteobacteria | Betaproteobacteria  | IS-44               |                     |                           |            |
|            | 2511ff5d78ef6d5c9819a09ca5d9eaa    | 0.53      | 0.01             | 5.9E-04 | 2.0E-04 | 3.9E-04       | 0       | 0       | 0       | Bacteria   | Proteobacteria | Deltaproteobacteria | Myxococcales        |                     |                           |            |
|            | a3b2563c2e0b9dc498975725b75f56e0   | 0.50      | 0.035            | 2.3E-04 | 1.1E-03 | 5.9E-04       | 0       | 0       | 0       | Bacteria   | Proteobacteria | Gammaproteobacteria | Xanthomonadales     | Sinobacteraceae     | Steroidobacter            |            |
|            | c164f002b5502c5963286a9322833a0    | 0.45      | 0.05             | 2.9E-04 | 9.8E-04 | 8.4E-04       | 0       | 0       | 1.5E-04 | Bacteria   | Proteobacteria | Gammaproteobacteria | Xanthomonadales     | Sinobacteraceae     | Steroidobacter            |            |
|            | 8ce5d403015616c859b6c39e84bcb4ff   | 0.50      | 0.045            | 5.9E-05 | 3.6E-04 | 8.5E-04       | 3.4E-04 | 0       | 0       | Bacteria   | Proteobacteria | Gammaproteobacteria | Xanthomonadales     | Sinobacteraceae     |                           |            |
|            | 81a2e8f0dc6a54d98f9c2de96dd44a2    | 0.57      | 0.005            | 8.2E-04 | 3.9E-04 | 1.8E-04       | 0       | 0       | 0       | Unassigned |                |                     |                     |                     |                           |            |
|            | 82b112505300c299a1c63bbe7482559    | 0.48      | 0.015            | 0       | 0       | 0             | 1.3E-03 | 1.4E-04 | 0       | Archaea    | Crenarchaeota  | Thaumarchaeota      | Nitrososphaerales   | Nitrososphaeraceae  | Candidatus Nitrososphaera | SCA1170    |
|            | cd00a403916692f64e4d2cbb730cb5     | 0.48      | 0.015            | 0       | 0       | 0             | 2.0E-04 | 2.7E-04 | 4.9E-05 | Bacteria   | Acidobacteria  | Chloracidobacteria  | R841                |                     |                           |            |
|            | 9f6d0ba5232b535de37f3cbf70d858d3   | 0.51      | 0.02             | 0       | 0       | 1.8E-05       | 9.8E-05 | 1.4E-04 | 2.9E-04 | Bacteria   | Acidobacteria  | Chloracidobacteria  | R841                |                     |                           |            |
|            | 25368dd1216da1c995e52e114599c2c0   | 0.64      | 0.005            | 0       | 0       | 0             | 2.4E-04 | 1.2E-04 | 9.8E-04 | Bacteria   | Acidobacteria  | Acidobacteria-5     |                     |                     |                           |            |
|            | 787f0baa22776727f75985671b5b2bc    | 0.48      | 0.015            | 0       | 0       | 0             | 2.4E-04 | 7.8E-05 | 2.7E-04 | Bacteria   | Acidobacteria  | Acidobacteria-6     | CCU21               |                     |                           |            |
|            | 621d1089e27a8550ac6fe480340f6951   | 0.66      | 0.01             | 9.8E-05 | 1.1E-04 | 3.7E-04       | 0       | 1.7E-03 | 1.4E-03 | Bacteria   | Acidobacteria  | Acidobacteria-6     | iii1-15             | mb2424              |                           |            |
|            | 11ed47d42819e5bcd4e6237d083872da   | 0.48      | 0.005            | 0       | 0       | 0             | 1.5E-03 | 0.0E+00 | 1.5E-03 | Bacteria   | Acidobacteria  | Acidobacteria-6     | iii1-15             |                     |                           |            |
|            | 55695752bd3ba9bc1e262b6737f64b97   | 0.48      | 0.01             | 0       | 0       | 0             | 5.4E-04 | 5.3E-04 | 2.9E-04 | Bacteria   | Acidobacteria  | Acidobacteria-6     | iii1-15             |                     |                           |            |
|            | a887236ee0501cd866abac069301cd     | 0.52      | 0.01             | 0       | 0       | 0             | 3.4E-04 | 3.9E-05 | 6.1E-04 | Bacteria   | Acidobacteria  | Acidobacteria-6     | iii1-15             |                     |                           |            |
|            | dfa6be6ab09b40cf408366b32d58f694   | 0.62      | 0.01             | 1.4E-04 | 0       | 3.4E-04       | 6.4E-04 | 2.0E-04 | 2.1E-03 | Bacteria   | Acidobacteria  | Acidobacteria-6     | iii1-15             |                     |                           |            |
|            | 1f6720450a1dc9d37c5dadcc071c4c07f  | 0.57      | 0.02             | 0       | 0       | 3.6E-04       | 0       | 6.3E-04 | 6.6E-04 | Bacteria   | Acidobacteria  | Acidobacteria-6     | iii1-15             |                     |                           |            |
|            | a54ccdf14f894c10fcffacc096aa5      | 0.43      | 0.04             | 0       | 0       | 0             | 0       | 3.9E-04 | 0       | Bacteria   | Acidobacteria  | Acidobacteria-6     | iii1-15             |                     |                           |            |
|            | 3298a670bc92abe1ed8da51b23323cb    | 0.47      | 0.035            | 0       | 0       | 1.8E-05       | 6.8E-04 | 5.9E-05 | 1.2E-04 | Bacteria   | Acidobacteria  | Acidobacteria       | Acidobacteriales    | Acidobacteriaceae   | Granulicella              | tundricola |
|            | d60cb0c30d33260632e57400d749df4    | 0.62      | 0.015            | 5.9E-05 | 2.2E-04 | 1.2E-04       | 2.0E-04 | 3.1E-04 | 1.4E-03 | Bacteria   | Acidobacteria  | Solibacteres        | Solibacteriales     | Rhyobacteraceae     |                           |            |
|            | 1349d393b150b4cea3a0d99c45c76810   | 0.49      | 0.045            | 0       | 0       | 1.1E-04       | 7.8E-04 | 0       | 5.6E-04 | Bacteria   | Acidobacteria  | Solibacteres        | Solibacteriales     | Rhyobacteraceae     | Candidatus Solibacter     |            |
|            | 1839e46bb8e4d01c6dc3fb75a2469389   | 0.63      | 0.005            | 0       | 0       | 3.4E-04       | 3.9E-04 | 3.3E-04 | 8.6E-04 | Bacteria   | Actinobacteria | Acidimicrobia       | Acidimicrobiales    | C111                |                           |            |
|            | 7b1dc44c74f99c460cfad4362f2c9      | 0.67      | 0.005            | 0       | 0       | 0             | 2.0E-04 | 4.3E-04 | 1.3E-03 | Bacteria   | Actinobacteria | Acidimicrobia       | Acidimicrobiales    | C111                |                           |            |
|            | 28c2c8f4d647cdd4b35caae32d2a7f21   | 0.47      | 0.01             | 0       | 0       | 1.8E-05       | 2.0E-04 | 3.5E-04 | 7.3E-05 | Bacteria   | Actinobacteria | Acidimicrobia       | Acidimicrobiales    | C111                |                           |            |
|            | 1bbcf41d756f879c072c9de9035841e    | 0.53      | 0.015            | 2.0E-05 | 0       | 5.3E-05       | 0       | 3.1E-04 | 2.9E-04 | Bacteria   | Actinobacteria | Acidimicrobia       | Acidimicrobiales    | EB1017              |                           |            |
|            | bba6a0644d4862a5ba106b8bb8bce4014  | 0.43      | 0.035            | 0       | 0       | 0             | 2.3E-04 | 2.2E-04 | 2.2E-04 | Bacteria   | Actinobacteria | Acidimicrobia       | Acidimicrobiales    | EB1017              |                           |            |
|            | 0ecdca55b8e71511c514118ef24f24f    | 0.37      | 0.05             | 0       | 0       | 0             | 4.4E-04 | 0       | 1.5E-04 | Bacteria   | Actinobacteria | Acidimicrobia       | Acidimicrobiales    | EB1017              |                           |            |
|            | 65f23a9351c81cf10a25003861e9b930   | 0.74      | 0.005            | 7.8E-05 | 8.4E-05 | 3.6E-05       | 3.4E-04 | 6.5E-04 | 1.3E-03 | Bacteria   | Actinobacteria | Acidimicrobia       | Acidimicrobiales    | lamiaceae           | Iamia                     |            |
|            | 00c2825c675230626f5d99415098a2e    | 0.74      | 0.005            | 0       | 2.0E-04 | 3.9E-04       | 2.0E-04 | 7.4E-04 | 1.4E-03 | Bacteria   | Actinobacteria | Acidimicrobia       | Acidimicrobiales    |                     |                           |            |
|            | d739ec728a0cbb09                   |           |                  |         |         |               |         |         |         |            |                |                     |                     |                     |                           |            |

|                                   |      |       |         |         |         |         |         |         |          |                  |                     |                     |                       |                              |             |
|-----------------------------------|------|-------|---------|---------|---------|---------|---------|---------|----------|------------------|---------------------|---------------------|-----------------------|------------------------------|-------------|
| c07285c15d87efc83ba4b7908eb0a502  | 0.57 | 0.015 | 0       | 5.6E-05 | 8.9E-05 | 2.0E-04 | 1.8E-04 | 2.4E-04 | Bacteria | Actinobacteria   | Thermoleophilia     | Solirubrobacterales | Conexibacteraceae     |                              |             |
| 94ddc43f30b3de8bd67a4fa1886e95c   | 0.43 | 0.015 | 0       | 0       | 0       | 1.5E-04 | 2.0E-04 | 1.7E-04 | Bacteria | Actinobacteria   | Thermoleophilia     | Solirubrobacterales | Patulibacteraceae     |                              |             |
| 52548ba58220f84dc2e7e5f3f808da4   | 0.43 | 0.035 | 0       | 0       | 0       | 9.8E-05 | 7.8E-05 | 1.2E-04 | Bacteria | Actinobacteria   | Thermoleophilia     | Solirubrobacterales | Patulibacteraceae     |                              |             |
| 2071199791dd6418ab3dc0f450ef4467  | 0.52 | 0.005 | 0       | 0       | 0       | 0       | 2.9E-04 | 1.6E-03 | Bacteria | Actinobacteria   | Thermoleophilia     | Solirubrobacterales |                       |                              |             |
| 9b058df4e45ed6f79ab1cf325ae5453   | 0.68 | 0.005 | 0       | 3.1E-04 | 0       | 2.5E-03 | 3.7E-04 | 1.2E-03 | Bacteria | Actinobacteria   | Thermoleophilia     | Solirubrobacterales |                       |                              |             |
| b3997a39a26f08d316eb5db73755b147  | 0.64 | 0.01  | 0       | 1.4E-04 | 2.7E-04 | 0       | 4.1E-04 | 6.4E-04 | Bacteria | Actinobacteria   | Thermoleophilia     | Solirubrobacterales |                       |                              |             |
| 0cc472e3a2ca3eaab027236ae07f66a6  | 0.66 | 0.015 | 5.9E-05 | 7.3E-04 | 2.8E-04 | 1.5E-03 | 6.3E-04 | 9.5E-04 | Bacteria | Actinobacteria   | Thermoleophilia     | Solirubrobacterales |                       |                              |             |
| dceed9f1c600d105a2e2190220daf3a   | 0.37 | 0.05  | 0       | 0       | 0       | 3.4E-04 | 0       | 9.8E-05 | Bacteria | Bacteroidetes    | Saprosirae          | Saprosirales        | Chitinophagaceae      | Flavhumibacter               |             |
| 0fa8f8067ba892e2ec5215715986c55   | 0.67 | 0.005 | 0       | 0       | 0       | 1.5E-04 | 1.4E-04 | 2.5E-03 | Bacteria | Bacteroidetes    | Saprosirae          | Saprosirales        | Chitinophagaceae      |                              |             |
| 3676f2751212b17db73ceba471ac2264  | 0.60 | 0.005 | 0       | 0       | 0       | 0       | 8.4E-04 | 6.8E-04 | Bacteria | Bacteroidetes    | Saprosirae          | Saprosirales        | Chitinophagaceae      |                              |             |
| d326bb64c756840cdf8e484f2ea7652   | 0.70 | 0.005 | 1.6E-04 | 0       | 2.0E-04 | 2.4E-04 | 1.1E-03 | 1.7E-03 | Bacteria | Bacteroidetes    | Saprosirae          | Saprosirales        | Chitinophagaceae      |                              |             |
| d53e59e92eb37b67e7bd24d82ce5b642  | 0.67 | 0.005 | 0       | 0       | 0       | 4.9E-04 | 2.5E-04 | 1.3E-03 | Bacteria | Bacteroidetes    | Saprosirae          | Saprosirales        | Chitinophagaceae      |                              |             |
| 8b2e4b0d8be925fdd072f11437f12d16  | 0.58 | 0.01  | 1.2E-04 | 0       | 8.9E-05 | 0       | 1.8E-04 | 2.3E-03 | Bacteria | Bacteroidetes    | Saprosirae          | Saprosirales        | Chitinophagaceae      |                              |             |
| 9220a67cd134bc9946c6bf2ef5d5677db | 0.51 | 0.01  | 0       | 0       | 3.6E-05 | 1.5E-04 | 5.3E-04 | 0       | Bacteria | Bacteroidetes    | Saprosirae          | Saprosirales        | Chitinophagaceae      |                              |             |
| f5970a2d9ba0606ee9bf0c4962c1616   | 0.58 | 0.01  | 1.4E-04 | 0       | 1.8E-05 | 0       | 3.7E-04 | 1.1E-03 | Bacteria | Bacteroidetes    | Saprosirae          | Saprosirales        | Chitinophagaceae      |                              |             |
| 30248b567fbfb764be5be30bf8dabe    | 0.57 | 0.015 | 3.9E-05 | 3.1E-04 | 1.8E-05 | 0       | 1.8E-04 | 8.3E-04 | Bacteria | Bacteroidetes    | Saprosirae          | Saprosirales        | Chitinophagaceae      |                              |             |
| 5c68b89084dbbc1b106f50084e1f64a   | 0.48 | 0.015 | 0       | 0       | 0       | 0       | 2.5E-04 | 4.9E-05 | Bacteria | Bacteroidetes    | Saprosirae          | Saprosirales        | Chitinophagaceae      |                              |             |
| 4632a52c8a676053a5576485226844    | 0.50 | 0.03  | 5.9E-05 | 0       | 1.8E-05 | 2.4E-04 | 2.9E-04 | 5.9E-04 | Bacteria | Bacteroidetes    | Saprosirae          | Saprosirales        | Chitinophagaceae      |                              |             |
| 8ca10c82a9c0e44a6a0b4633a3ce50    | 0.54 | 0.03  | 0       | 2.0E-04 | 3.2E-04 | 1.0E-04 | 5.5E-04 | 4.2E-04 | Bacteria | Bacteroidetes    | Saprosirae          | Saprosirales        | Chitinophagaceae      |                              |             |
| b5bf9a9e3c46deda3866bc054aaf63a   | 0.55 | 0.035 | 0       | 2.8E-04 | 1.2E-04 | 1.5E-04 | 1.6E-04 | 1.5E-03 | Bacteria | Bacteroidetes    | Saprosirae          | Saprosirales        | Chitinophagaceae      |                              |             |
| 162734b3d02ff9e98aae10c383007e    | 0.43 | 0.04  | 0       | 0       | 0       | 2.0E-04 | 1.6E-04 | 4.9E-05 | Bacteria | Bacteroidetes    | Saprosirae          | Saprosirales        | Chitinophagaceae      |                              |             |
| 6e539678b0c419f24c02c9e9b19fea4f  | 0.53 | 0.045 | 3.9E-05 | 5.6E-05 | 1.8E-05 | 0       | 1.6E-04 | 5.1E-04 | Bacteria | Bacteroidetes    | Saprosirae          | Saprosirales        | Chitinophagaceae      |                              |             |
| 5e301f77b78181286f42e00ae5c6719   | 0.48 | 0.015 | 0       | 0       | 0       | 1.4E-04 | 2.7E-04 | 0       | Bacteria | Bacteroidetes    | Saprosirae          | Saprosirales        | Saprosiraceae         |                              |             |
| 5782a5103d58ce3d52228b877219d1a   | 0.52 | 0.015 | 0       | 1.8E-05 | 0       | 8.0E-04 | 3.2E-04 | 0       | Bacteria | Bacteroidetes    | Cytophagia          | Cytophagales        | Cytophagaceae         | Adhaeribacter                |             |
| bec3ba2dda29e48f28b9db1a176cf968  | 0.52 | 0.005 | 0       | 0       | 0       | 5.9E-04 | 1.8E-04 | 3.9E-04 | Bacteria | Bacteroidetes    | Cytophagia          | Cytophagales        | Cytophagaceae         | Cytophaga                    |             |
| 8e30d670f7e1f65e3b469e152700457   | 0.55 | 0.015 | 3.9E-05 | 5.6E-05 | 0.0E+00 | 0       | 1.8E-04 | 1.1E-03 | Bacteria | Bacteroidetes    | Cytophagia          | Cytophagales        | Cytophagaceae         | Dyadobacter                  |             |
| e613c492e2499af6606a34b0c83ff215  | 0.56 | 0.005 | 0       | 0       | 0       | 0       | 6.3E-04 | 1.7E-04 | Bacteria | Bacteroidetes    | Cytophagia          | Cytophagales        | Cytophagaceae         | Hymenobacter                 |             |
| bfb758aa2b184610485715737961d56   | 0.52 | 0.01  | 0       | 0       | 0       | 0       | 5.9E-04 | 8.6E-04 | Bacteria | Bacteroidetes    | Cytophagia          | Cytophagales        | Cytophagaceae         | Hymenobacter                 |             |
| adb66a41b5b8b1de4bb3bd273ad6e8ee  | 0.46 | 0.04  | 0       | 0       | 8.9E-05 | 0       | 1.0E-03 | 0       | Bacteria | Bacteroidetes    | Cytophagia          | Cytophagales        | Cytophagaceae         | Hymenobacter                 |             |
| 7b18d62fec8b2a08028eb9b01cabcf0   | 0.43 | 0.045 | 0       | 0       | 0       | 0       | 3.7E-04 | 0       | Bacteria | Bacteroidetes    | Cytophagia          | Cytophagales        | Cytophagaceae         | Hymenobacter                 |             |
| a82bb2bc3ce934173b6757467ff5190   | 0.46 | 0.02  | 0       | 0       | 1.8E-05 | 1.5E-04 | 7.8E-05 | 2.0E-04 | Bacteria | Bacteroidetes    | Cytophagia          | Cytophagales        | Cytophagaceae         | Spirosoma                    |             |
| 37b6d03c6e6080e19857dd3db579c4d9  | 0.37 | 0.05  | 0       | 0       | 0       | 0       | 4.9E-04 | 0       | Bacteria | Bacteroidetes    | Cytophagia          | Cytophagales        | Cytophagaceae         | Spirosoma                    |             |
| 23870d0574883d7d3debefbb227f91    | 0.72 | 0.005 | 3.9E-05 | 2.8E-05 | 2.0E-04 | 9.8E-05 | 4.1E-04 | 1.3E-03 | Bacteria | Bacteroidetes    | Cytophagia          | Cytophagales        | Cytophagaceae         |                              |             |
| 19952574bd7aaf6954178ca1d093751   | 0.48 | 0.015 | 0       | 0       | 0       | 9.8E-05 | 9.8E-05 | 2.4E-04 | Bacteria | Bacteroidetes    | Cytophagia          | Cytophagales        | Cytophagaceae         |                              |             |
| d5f9de142e947b4e4317723ba0be0c6   | 0.48 | 0.015 | 0       | 0       | 0       | 4.9E-05 | 2.0E-05 | 7.3E-05 | Bacteria | Bacteroidetes    | Cytophagia          | Cytophagales        | Cytophagaceae         |                              |             |
| 8c14f4c589b8e7e84ad7df40c0593f97  | 0.43 | 0.03  | 0       | 0       | 0       | 3.5E-04 | 9.8E-05 | 0       | Bacteria | Bacteroidetes    | Cytophagia          | Cytophagales        | Cytophagaceae         |                              |             |
| af65e1c188e779e147b11e8c3613158   | 0.43 | 0.035 | 0       | 0       | 0       | 3.9E-05 | 3.4E-04 | 0       | Bacteria | Bacteroidetes    | Cytophagia          | Cytophagales        | Cytophagaceae         |                              |             |
| 04a465f9b870f138a525f3f81dd52     | 0.51 | 0.045 | 3.9E-05 | 4.7E-04 | 5.3E-05 | 0       | 1.4E-04 | 1.7E-03 | Bacteria | Bacteroidetes    | Cytophagia          | Cytophagales        | Cytophagaceae         |                              |             |
| e939ef30906bff172e90042f19d769    | 0.52 | 0.005 | 0       | 0       | 0       | 4.9E-05 | 1.8E-04 | 1.7E-04 | Bacteria | Bacteroidetes    | Cytophagia          | Cytophagales        | Cytophagaceae         |                              |             |
| ab39f5e96c0df8069595745b5cf30     | 0.43 | 0.035 | 0       | 0       | 0       | 0       | 1.2E-04 | 2.9E-04 | Bacteria | Bacteroidetes    | Flavobacteriia      | Flavobacteriales    | Cryomorphaceae        | Fluviicola                   |             |
| 7d9f90a81cc4cd3f78117b0bb87025a54 | 0.55 | 0.005 | 0       | 2.1E-04 | 6.4E-04 | 1.7E-03 | 1.3E-03 | 0       | Bacteria | Bacteroidetes    | Flavobacteriia      | Flavobacteriales    | Flavobacteriaceae     | Flavobacterium               | succinicans |
| c9c69005371a5d23290b256b08d5127a  | 0.70 | 0.005 | 0       | 1.4E-04 | 0       | 2.4E-04 | 3.5E-03 | 4.9E-03 | Bacteria | Bacteroidetes    | Flavobacteriia      | Flavobacteriales    | Flavobacteriaceae     | Flavobacterium               | succinicans |
| 8aa4408a8e8c668f734d217f8e17ca    | 0.56 | 0.005 | 0       | 0       | 0       | 6.8E-04 | 3.2E-04 | 0       | Bacteria | Bacteroidetes    | Flavobacteriia      | Flavobacteriales    | Flavobacteriaceae     | Flavobacterium               |             |
| 7f73c6447d1c3bc8120f64255ba9a0ed  | 0.43 | 0.03  | 0       | 0       | 5.4E-04 | 7.8E-05 | 2.2E-04 | 0       | Bacteria | Bacteroidetes    | Flavobacteriia      | Flavobacteriales    | Flavobacteriaceae     | Flavobacterium               |             |
| ff5f53c930e18246ac32775e36f8a00b  | 0.43 | 0.04  | 0       | 0       | 0       | 4.7E-04 | 7.3E-05 | 0       | Bacteria | Bacteroidetes    | Flavobacteriia      | Flavobacteriales    | Flavobacteriaceae     | Flavobacterium               |             |
| 2e1aad0ca41b59e6d162bde16e51bf5   | 0.43 | 0.05  | 0       | 0       | 0       | 5.9E-05 | 7.6E-04 | 0       | Bacteria | Bacteroidetes    | Flavobacteriia      | Flavobacteriales    | Flavobacteriaceae     | Flavobacterium               |             |
| de3ba83f7f424dad4abc8a5d64f27e6a2 | 0.47 | 0.02  | 0       | 0       | 1.8E-05 | 0       | 1.8E-04 | 3.9E-04 | Bacteria | Bacteroidetes    | Sphingobacteriia    | Sphingobacteriales  | Chitinophagaceae      |                              |             |
| d93710531847e0d902d72ae285c7c6c   | 0.68 | 0.005 | 1.8E-04 | 6.1E-04 | 0       | 5.9E-04 | 5.5E-04 | 2.7E-03 | Bacteria | Bacteroidetes    | Sphingobacteriia    | Sphingobacteriales  | Sphingobacteriaceae   |                              |             |
| e2a5e31516996510d10ed74970779d    | 0.58 | 0.015 | 1.6E-04 | 0       | 8.9E-05 | 3.3E-04 | 3.5E-04 | 2.2E-03 | Bacteria | Bacteroidetes    | Sphingobacteriia    | Sphingobacteriales  | Sphingobacteriaceae   |                              |             |
| 8c0cb1d08883f00db64a594a4bde667   | 0.48 | 0.025 | 0       | 0       | 2.5E-04 | 2.9E-04 | 0       | 1.2E-03 | Bacteria | Bacteroidetes    | Sphingobacteriia    | Sphingobacteriales  | Sphingobacteriaceae   |                              |             |
| 7676216b4f98ba9f7d80e56e1f062ce0  | 0.48 | 0.015 | 0       | 0       | 0       | 0       | 3.9E-05 | 3.7E-04 | Bacteria | Bacteroidetes    | Sphingobacteriia    | Sphingobacteriales  |                       |                              |             |
| 810698124844e2e29a68c397018267    | 0.48 | 0.02  | 0       | 0       | 0       | 3.3E-04 | 8.1E-04 | 0       | Bacteria | Bacteroidetes    | Sphingobacteriia    | Sphingobacteriales  |                       |                              |             |
| 5765b81dbe5dd5d60a1923c8b06923    | 0.43 | 0.04  | 0       | 0       | 0       | 1.2E-04 | 1.2E-04 | 0       | Bacteria | Bacteroidetes    | Sphingobacteriia    | Sphingobacteriales  |                       |                              |             |
| f242b9de35d5a00e136f0e26810606e   | 0.43 | 0.04  | 0       | 0       | 0       | 9.8E-05 | 2.7E-04 | 0       | Bacteria | Bacteroidetes    | Sphingobacteriia    | Sphingobacteriales  |                       |                              |             |
| 14af276ef7628b69e0f48ec6d5744d    | 0.43 | 0.035 | 0       | 0       | 0       | 9.8E-05 | 1.7E-04 | 0       | Bacteria | Chlamydiae       | Chlamydia           | Chlamydiales        | Parachlamydiaceae     |                              |             |
| da150af3f059124c280b5f08472c550e  | 0.74 | 0.005 | 0       | 0       | 0       | 4.2E-03 | 1.4E-03 | 0       | Bacteria | Chlamydiae       | Chlamydia           | Chlamydiales        | Rhabdodochlamydiaceae | Candidatus Rhabdodochlamydia |             |
| 92feef56ef62f1baa9c42599312672    | 0.43 | 0.045 | 0       | 0       | 0       | 9.8E-05 | 1.4E-04 | 2.4E-05 | Bacteria | Chloroflexi      | Anaerolineae        | Caldilineales       | Caldilineaceae        |                              |             |
| e77e7ca09de4e91738c41f6d22c6fa7   | 0.85 | 0.005 | 0       | 3.2E-04 | 1.2E-03 | 1.2E-03 | 2.1E-03 | 0       | Bacteria | Chloroflexi      | Ellin6529           |                     |                       |                              |             |
| 961f2becfe912795fe0c1cc1e612a31   | 0.58 | 0.015 | 0       | 1.1E-04 | 8.9E-05 | 6.4E-04 | 8.0E-04 | 6.4E-04 | Bacteria | Chloroflexi      | Ellin6529           |                     |                       |                              |             |
| 71af75feffee8202dfa36591fe3933    | 0.48 | 0.015 | 0       | 0       | 0       | 0       | 2.5E-04 | 3.2E-04 | Bacteria | Chloroflexi      | Thermomicrobia      | JG30-KF-CM45        |                       |                              |             |
| c33da9a783bd93fb95b8d2f30e5e662   | 0.61 | 0.015 | 0       | 0       | 2.8E-04 | 4.9E-05 | 9.8E-05 | 7.8E-04 | Bacteria | Chloroflexi      | Thermomicrobia      | JG30-KF-CM45        |                       |                              |             |
| b246f4a628aeedd94bab1249bfa95a    | 0.43 | 0.045 | 0       | 0       | 0       | 0       | 7.8E-05 | 3.7E-04 | Bacteria | Chloroflexi      | TK10                |                     |                       |                              |             |
| 8c00569991341a9c5d6968a5581d70f2  | 0.65 | 0.01  | 7.8E-05 | 1.1E-04 | 5.3E-05 | 2.0E-04 | 3.9E-04 | 6.4E-04 | Bacteria | Chloroflexi      | FBP                 |                     |                       |                              |             |
| e344eff9c512c866355a37172e4ee     | 0.57 | 0.015 | 5.9E-05 | 0       | 1.2E-04 | 9.3E-04 | 5.9E-05 | 9.5E-04 | Bacteria | Firmicutes       | Bacilli             | Bacillales          |                       |                              |             |
| ae0f6890c4fb18dcd7f4d89da4c05c3   | 0.37 | 0.05  | 0       | 0       | 0       | 0       | 0       | 1.1E-03 | Bacteria | Gemmatimonadetes | Gemm-3              |                     |                       |                              |             |
| 5124885f63e9dd60a82c8eb40a9d632a  | 0.73 | 0.005 | 0       | 2.8E-05 | 5.3E-05 | 9.8E-05 | 3.7E-04 | 1.8E-03 | Bacteria | Gemmatimonadetes | Gemmatimonadetes    | Ellin5290           |                       |                              |             |
| 96c663304a1465453af778aed799d5    | 0.53 | 0.04  | 1.2E-04 | 2.8E-05 | 3.6E-05 | 0       | 2.2E-04 | 8.6E-04 | Bacteria | Gemmatimonadetes | Gemmatimonadetes    | Gemmatimonadales    | Ellin5301             |                              |             |
| 52023db770e05c849d0e1991ee9e1c14  | 0.55 | 0.005 | 2.0E-05 | 0       | 0       | 1.5E-04 | 1.2E-04 | 2.2E-04 | Bacteria | Planctomycetes   | Phycisphaerae       | WD2101              |                       |                              |             |
| 8aa91a9bb212936b82df2be7bb696f3   | 0.43 | 0.015 | 0       | 0       | 0       | 0       | 2.2E-04 | 1.7E-04 | Bacteria | Planctomycetes   | Phycisphaerae       | WD2101              |                       |                              |             |
| 9ab1cc159a9e10f36c3a5bcbf341735   | 0.48 | 0.03  | 0       | 0       | 0       | 0       | 7.1E-04 | 0       | Bacteria | Planctomycetes   | Planctomycetia      | Gemmatales          | Gemmataceae           | Gemmata                      |             |
| 4ac6029e9f4bf0e058026f231e41c94d  | 0.43 | 0.025 | 0       | 0       | 0       | 0       | 3.5E-04 | 4.9E-05 | Bacteria | Planctomycetes   | Planctomycetia      | Gemmatales          | Isosphaeraceae        |                              |             |
| b6be1fc7523d2b58f9fa80874bed789   | 0.56 | 0.01  | 0       | 0       | 0       | 0       | 3.9E-05 | 5.6E-04 | Bacteria | Planctomycetes   | Planctomycetia      | Pirellulales        | Pirellulaceae         |                              |             |
| 124556a7e65b0973b47f28634a1ea     | 0.51 | 0.025 | 9.8E-05 | 0       | 0       | 0       | 2.5E-04 | 1.5E-04 | Bacteria | Planctomycetes   | Planctomycetia      | Pirellulales        | Pirellulaceae         |                              |             |
| d89f1df69a375464d04a6565a3e27a    | 0.51 | 0.045 | 5.9E-05 | 0       | 1.1E-04 | 0       | 7.8E-05 | 7.1E-04 | Bacteria | Planctomycetes   | vadinHA49           | DH61                |                       |                              |             |
| e7da441a22df32da317ba29a23b121a   | 0.43 | 0.035 | 0       | 0       | 0       | 3.4E-04 | 2.5E-04 | 4.6E-04 | Bacteria | Proteobacteria   | Alphaproteobacteria | Caulobacterales     | Caulobacteraceae      | Phenyllobacterium            |             |
| 3bd2c1f12ba1e487f3079121884404a   | 0.43 | 0.045 | 0       | 0       | 0       | 0       | 3.5E-04 |         |          |                  |                     |                     |                       |                              |             |

|                                    |      |       |         |         |         |         |         |         |          |                 |                     |                     |                      |                          |                       |
|------------------------------------|------|-------|---------|---------|---------|---------|---------|---------|----------|-----------------|---------------------|---------------------|----------------------|--------------------------|-----------------------|
| d03e0a7fdacf9904b6e57921bb1308b    | 0.48 | 0.03  | 0       | 0       | 0       | 0       | 2.0E-05 | 1.2E-03 | Bacteria | Proteobacteria  | Alphaproteobacteria | Sphingomonadales    | Sphingomonadaceae    | <i>Sphingobium</i>       |                       |
| 4c9ad6211096cef7339b99102a7ab037   | 0.48 | 0.045 | 0       | 1.7E-04 | 2.1E-04 | 4.9E-04 | 5.7E-04 | 0       | Bacteria | Proteobacteria  | Alphaproteobacteria | Sphingomonadales    | Sphingomonadaceae    | <i>Sphingomonas</i>      | <i>wittichii</i>      |
| 5cb573c9685b3a7612abdd1da56bfff581 | 0.64 | 0.005 | 0       | 0       | 0       | 0       | 2.7E-04 | 4.2E-04 | Bacteria | Proteobacteria  | Alphaproteobacteria | Sphingomonadales    | Sphingomonadaceae    | <i>Sphingomonas</i>      |                       |
| 56ca716d746ce9b13292730ede2a4fff   | 0.55 | 0.01  | 0       | 1.4E-04 | 0       | 0       | 1.4E-03 | 0       | Bacteria | Proteobacteria  | Alphaproteobacteria | Sphingomonadales    | Sphingomonadaceae    | <i>Sphingomonas</i>      |                       |
| c8d0f2c60798ab91ac26b30f4e6cae2    | 0.48 | 0.015 | 0       | 0       | 0       | 0       | 3.4E-04 | 2.2E-04 | 1.5E-04  | Bacteria        | Proteobacteria      | Alphaproteobacteria | Sphingomonadales     | Sphingomonadaceae        | <i>Sphingomonas</i>   |
| 07bb4dc1f9ec324a6d078a5f1cbd9e0f   | 0.56 | 0.005 | 0       | 0       | 0       | 0       | 2.0E-04 | 4.5E-04 | 2.4E-04  | Bacteria        | Proteobacteria      | Alphaproteobacteria | Sphingomonadales     | Sphingomonadaceae        |                       |
| d865b5425239838757e91a4bf8e2832a   | 0.55 | 0.045 | 2.5E-04 | 1.7E-04 | 2.5E-04 | 2.9E-04 | 5.1E-04 | 1.0E-03 | Bacteria | Proteobacteria  | Alphaproteobacteria | Sphingomonadales    | Sphingomonadaceae    |                          |                       |
| 86610b9c2f6e08140d453ee212ac7f677  | 0.52 | 0.01  | 0       | 3.1E-04 | 0       | 4.4E-04 | 8.8E-04 | 0       | Bacteria | Proteobacteria  | Betaproteobacteria  | Burkholderiales     | Burkholderiaceae     | <i>Burkholderia</i>      | <i>andropogonis</i>   |
| 38a438c0a9c980ee192378b94dd688973  | 0.56 | 0.005 | 0       | 0       | 0       | 4.4E-04 | 6.8E-04 | 3.2E-04 | Bacteria | Proteobacteria  | Betaproteobacteria  | Burkholderiales     | Comamonadaceae       |                          |                       |
| 6d2d187f4fa77f51e8ca227b27335e6    | 0.74 | 0.005 | 0       | 4.5E-04 | 0       | 3.9E-04 | 1.0E-03 | 1.9E-03 | Bacteria | Proteobacteria  | Betaproteobacteria  | Burkholderiales     | Comamonadaceae       |                          |                       |
| 3f0b0108af3848e5b83c520c3f0daa88   | 0.62 | 0.015 | 4.1E-04 | 1.7E-04 | 1.2E-04 | 4.4E-04 | 9.0E-04 | 8.8E-04 | Bacteria | Proteobacteria  | Betaproteobacteria  | Burkholderiales     | Comamonadaceae       |                          |                       |
| d9d980e45e7118c91301ed3c168b9af7   | 0.63 | 0.02  | 0       | 3.7E-03 | 2.3E-04 | 0       | 7.6E-04 | 9.3E-03 | Bacteria | Proteobacteria  | Betaproteobacteria  | Burkholderiales     | Comamonadaceae       |                          |                       |
| 58d23e4d8eb0df6dbdd00e1ab2212f3c   | 0.47 | 0.02  | 0       | 8.4E-05 | 0       | 0       | 6.5E-04 | 4.6E-04 | Bacteria | Proteobacteria  | Betaproteobacteria  | Burkholderiales     | Oxalobacteraceae     | <i>Janthinobacterium</i> |                       |
| b57744bd30af9f7a4d538d0aba2759b6   | 0.52 | 0.04  | 0       | 8.9E-04 | 2.3E-04 | 9.8E-05 | 3.4E-03 | 7.8E-04 | Bacteria | Proteobacteria  | Betaproteobacteria  | Burkholderiales     | Oxalobacteraceae     | <i>Janthinobacterium</i> |                       |
| 20ad543b3a158e617aa2f39adbf005b6   | 0.72 | 0.01  | 5.7E-04 | 1.4E-04 | 7.6E-04 | 4.9E-04 | 1.3E-03 | 3.0E-03 | Bacteria | Proteobacteria  | Betaproteobacteria  | Burkholderiales     | Oxalobacteraceae     |                          |                       |
| ao7502d409329c1fbb554d1c037cf53c   | 0.48 | 0.005 | 0       | 0       | 0       | 0       | 1.4E-04 | 8.6E-04 | Bacteria | Proteobacteria  | Betaproteobacteria  |                     | Ellin6067            |                          |                       |
| 8fb04b80ed1f9936da6e8d372be0a8d2   | 0.90 | 0.005 | 0       | 4.2E-04 | 0       | 1.0E-03 | 1.2E-03 | 2.2E-03 | Bacteria | Proteobacteria  | Betaproteobacteria  |                     | IS-44                |                          |                       |
| 909f95ca78551ccc9e0ce36da14a62     | 0.51 | 0.01  | 0       | 1.4E-04 | 0       | 0       | 2.2E-04 | 1.2E-03 | Bacteria | Proteobacteria  | Betaproteobacteria  |                     | Methylophilales      | Methylophilaceae         |                       |
| fa2d8337da84d098aae0b59d0cc41262   | 0.48 | 0.015 | 0       | 0       | 0       | 0       | 9.8E-05 | 5.9E-04 | Bacteria | Proteobacteria  | Betaproteobacteria  |                     | Methylophilales      |                          |                       |
| 913e48d9e2cae8fdb73d2822a52a27b    | 0.43 | 0.035 | 0       | 0       | 0       | 9.8E-05 | 0       | 2.0E-04 | Bacteria | Proteobacteria  | Betaproteobacteria  |                     | MND1                 |                          |                       |
| e348dd0f8b01220a2d4fc152bc8feb4e   | 0.48 | 0.01  | 0       | 0       | 0       | 2.9E-04 | 2.5E-04 | 4.9E-05 | Bacteria | Proteobacteria  | Betaproteobacteria  |                     | SC-I-84              |                          |                       |
| 7a00364ceddf47ae39c0e46cccaf831    | 0.46 | 0.015 | 2.0E-05 | 0       | 0       | 9.8E-05 | 5.9E-05 | 2.0E-04 | Bacteria | Proteobacteria  | Betaproteobacteria  |                     | SC-I-84              |                          |                       |
| ad4db7a139d3fd19f38897fa9de0e62f   | 0.49 | 0.015 | 9.8E-05 | 0       | 1.8E-05 | 2.4E-04 | 5.5E-04 | 1.7E-04 | Bacteria | Proteobacteria  | Betaproteobacteria  |                     | SC-I-84              |                          |                       |
| 81b750e461c4c19b71bb69a7be144baf   | 0.59 | 0.035 | 7.8E-05 | 5.6E-05 | 6.9E-04 | 0       | 7.8E-04 | 1.0E-03 | Bacteria | Proteobacteria  | Betaproteobacteria  |                     | SC-I-84              |                          |                       |
| f344f26cf00db9133c7fa5cc0772bba4d  | 0.46 | 0.04  | 0       | 0       | 3.6E-05 | 0       | 3.5E-04 | 2.0E-04 | Bacteria | Proteobacteria  | Betaproteobacteria  |                     | SC-I-84              |                          |                       |
| 280bafe980eaaba7af3824b1d2f6d695   | 0.43 | 0.045 | 0       | 0       | 0       | 2.0E-04 | 0       | 2.0E-04 | Bacteria | Proteobacteria  | Betaproteobacteria  |                     | SC-I-84              |                          |                       |
| 06f249e121d0aa52f0a23d83a7722ae5   | 0.72 | 0.01  | 0       | 3.9E-04 | 1.0E-03 | 7.8E-04 | 1.2E-03 | 1.6E-03 | Bacteria | Proteobacteria  | Betaproteobacteria  |                     |                      |                          |                       |
| 2ef6e4e62813fdcf2f8edc5bfc59af1    | 0.43 | 0.025 | 0       | 0       | 0       | 9.8E-05 | 5.9E-05 | 2.4E-05 | Bacteria | Proteobacteria  | Betaproteobacteria  |                     |                      |                          |                       |
| 71a54a61b5a175de9f11706f400b5f8    | 0.43 | 0.05  | 0       | 0       | 0       | 2.4E-04 | 7.8E-05 | 2.4E-05 | Bacteria | Proteobacteria  | Deltaproteobacteria | Bdellovibrionales   | Bdellovibrionaceae   | <i>Bdellovibrio</i>      |                       |
| 80f2c70db5de14b0d28d768354709385   | 0.69 | 0.005 | 1.4E-04 | 0       | 0       | 2.9E-04 | 3.9E-04 | 1.5E-03 | Bacteria | Proteobacteria  | Deltaproteobacteria |                     | Myxococcales         | Haliangiaceae            |                       |
| ada110dc0f8e1a306a122f30a9d43f37   | 0.43 | 0.035 | 0       | 0       | 0       | 0       | 0       | 1.8E-03 | Bacteria | Proteobacteria  | Deltaproteobacteria |                     | Myxococcales         | Haliangiaceae            |                       |
| 9d8e74d97255086f2f27037b67a1f063   | 0.43 | 0.05  | 0       | 0       | 0       | 0       | 2.2E-04 | 1.5E-04 | Bacteria | Proteobacteria  | Deltaproteobacteria |                     | Myxococcales         | Nannocystis              |                       |
| 34d5a925c1c9b6d21ed956019c25e7f1   | 0.48 | 0.03  | 0       | 0       | 0       | 9.8E-05 | 3.5E-04 | 5.6E-04 | Bacteria | Proteobacteria  | Deltaproteobacteria |                     | Myxococcales         | Polyangiaceae            | <i>Aetherobacter</i>  |
| 77b508509e0e046b8dc42af546197489   | 0.43 | 0.045 | 0       | 0       | 0       | 9.8E-05 | 0       | 7.6E-04 | Bacteria | Proteobacteria  | Deltaproteobacteria |                     | Myxococcales         | Polyangiaceae            | <i>fasciculatus</i>   |
| 4c2804149785f51fd32e961cd0f86f     | 0.64 | 0.005 | 3.9E-05 | 2.8E-05 | 1.2E-04 | 9.8E-05 | 9.4E-04 | 4.4E-04 | Bacteria | Proteobacteria  | Deltaproteobacteria |                     | Myxococcales         |                          |                       |
| cc8635ccdd74156181e6812fcb472deb   | 0.52 | 0.005 | 0       | 0       | 0       | 0       | 2.7E-04 | 2.0E-04 | Bacteria | Proteobacteria  | Deltaproteobacteria |                     | Myxococcales         |                          |                       |
| d741925b8c69408b61996d11534f374    | 0.60 | 0.005 | 0       | 1.1E-04 | 1.2E-04 | 0       | 2.0E-04 | 1.2E-03 | Bacteria | Proteobacteria  | Deltaproteobacteria |                     | Myxococcales         |                          |                       |
| 862421f10ce11ec0b8b77a544cd4f44    | 0.73 | 0.005 | 2.3E-04 | 0       | 1.2E-04 | 3.4E-04 | 7.4E-04 | 1.9E-03 | Bacteria | Proteobacteria  | Deltaproteobacteria |                     | Myxococcales         |                          |                       |
| 82d69a8fa3757238ead7808b0d1b068    | 0.48 | 0.01  | 0       | 0       | 0       | 4.9E-04 | 0       | 5.1E-04 | Bacteria | Proteobacteria  | Deltaproteobacteria |                     | Myxococcales         |                          |                       |
| ca7ed2d2Cc85a7b9898a8e641b457e50   | 0.48 | 0.015 | 0       | 0       | 0       | 0       | 7.8E-05 | 4.9E-04 | Bacteria | Proteobacteria  | Deltaproteobacteria |                     | Myxococcales         |                          |                       |
| 59e5a05f7e45e5518cae40d05a8f19c    | 0.43 | 0.025 | 0       | 0       | 0       | 0       | 5.9E-04 | 0       | Bacteria | Proteobacteria  | Deltaproteobacteria |                     | Myxococcales         |                          |                       |
| 078da005b9b0a34902761d6dbcdabeb5   | 0.43 | 0.03  | 0       | 0       | 0       | 0       | 2.0E-05 | 2.0E-04 | Bacteria | Proteobacteria  | Deltaproteobacteria |                     | Myxococcales         |                          |                       |
| 72f9c77f01a4cadceecbea82d0affef    | 0.43 | 0.03  | 0       | 0       | 0       | 2.9E-04 | 5.9E-05 | 0       | Bacteria | Proteobacteria  | Deltaproteobacteria |                     | Myxococcales         |                          |                       |
| ca85b4350a2aa8e8c97d97cc9ec81843   | 0.53 | 0.05  | 0       | 0       | 3.6E-04 | 4.9E-05 | 3.1E-04 | 4.2E-04 | Bacteria | Proteobacteria  | Deltaproteobacteria |                     | Myxococcales         |                          |                       |
| c9e7926fb6bf2f8d7ed26a705d76e58    | 0.52 | 0.01  | 0       | 0       | 0       | 2.4E-04 | 2.2E-04 | 1.2E-04 | Bacteria | Proteobacteria  | Deltaproteobacteria | Syntrophobacterales | Syntrophobacteraceae |                          |                       |
| 622d44b277eb055836e26b649058428b   | 0.48 | 0.025 | 0       | 0       | 0       | 0       | 0       | 1.1E-03 | Bacteria | Proteobacteria  | Gammaproteobacteria | Alteromonadales     | 211ds20              |                          |                       |
| 1688f14bc9aOcc2caeae650d6e6553     | 0.56 | 0.005 | 0       | 2.8E-05 | 0       | 2.0E-04 | 7.8E-05 | 9.3E-04 | Bacteria | Proteobacteria  | Gammaproteobacteria | Alteromonadales     | OM60                 |                          |                       |
| 0e37606c4730ad035e70c379897bae26a  | 0.43 | 0.03  | 0       | 0       | 0       | 9.8E-05 | 2.9E-05 | 4.9E-05 | Bacteria | Proteobacteria  | Gammaproteobacteria | HTCC2188            | HTCC2089             |                          |                       |
| e2766a0909f98130248d823bc17f8be    | 0.37 | 0.045 | 0       | 0       | 0       | 1.4E-02 | 2.0E-05 | 0       | Bacteria | Proteobacteria  | Gammaproteobacteria | Pasteurellales      | Pasteurellaceae      | <i>Haemophilus</i>       | <i>parainfluenzae</i> |
| f8e023e914f7b9e5c395d0adf8e7177f   | 0.58 | 0.015 | 2.0E-05 | 0       | 5.3E-05 | 4.4E-04 | 1.4E-04 | 6.1E-04 | Bacteria | Proteobacteria  | Gammaproteobacteria | Pseudomonadales     | Moraxellaceae        |                          |                       |
| d269a236f5e0c5f1aad3d4c14e17278    | 0.49 | 0.035 | 0       | 0       | 2.1E-04 | 9.8E-04 | 8.4E-04 | 0       | Bacteria | Proteobacteria  | Gammaproteobacteria | Pseudomonadales     | Pseudomonadaceae     | <i>Pseudomonas</i>       |                       |
| cc635e9ce849498d6136833850e1459    | 0.54 | 0.015 | 0       | 2.2E-04 | 0       | 0       | 2.0E-04 | 3.9E-04 | Bacteria | Proteobacteria  | Gammaproteobacteria | Xanthomonadales     | Sinobacteraceae      | <i>Alkanibacter</i>      | <i>difficilis</i>     |
| 3558bc5e3381a3f199cf592d72c83055   | 0.43 | 0.035 | 0       | 0       | 0       | 2.9E-04 | 0       | 2.7E-04 | Bacteria | Proteobacteria  | Gammaproteobacteria | Xanthomonadales     | Sinobacteraceae      | <i>Panacagriflanas</i>   | <i>perspica</i>       |
| 846d0749c544add2ced6dd7c7388d686   | 0.51 | 0.01  | 2.0E-05 | 0       | 0       | 4.9E-05 | 2.0E-04 | 9.8E-05 | Bacteria | Proteobacteria  | Gammaproteobacteria | Xanthomonadales     | Sinobacteraceae      |                          |                       |
| 8ed314126fe22cbf345f64e859f8f7e    | 0.52 | 0.01  | 0       | 0       | 0       | 1.5E-04 | 2.9E-04 | 4.9E-05 | Bacteria | Proteobacteria  | Gammaproteobacteria | Xanthomonadales     | Sinobacteraceae      |                          |                       |
| d0f57ae2a67f063bd064cf5500a14e066  | 0.62 | 0.01  | 2.2E-04 | 8.4E-05 | 3.9E-04 | 2.0E-04 | 2.3E-04 | 1.8E-03 | Bacteria | Proteobacteria  | Gammaproteobacteria | Xanthomonadales     | Sinobacteraceae      |                          |                       |
| c7d56c4b33907b6662fdd6d349f1e5b    | 0.52 | 0.015 | 0       | 0       | 0       | 0       | 3.9E-05 | 7.3E-04 | Bacteria | Proteobacteria  | Gammaproteobacteria | Xanthomonadales     | Sinobacteraceae      |                          |                       |
| d3d9f9c5a32af82c53a2922fda8a009e   | 0.58 | 0.015 | 0       | 0       | 1.2E-04 | 0       | 1.0E-03 | 7.8E-04 | Bacteria | Proteobacteria  | Gammaproteobacteria | Xanthomonadales     | Sinobacteraceae      |                          |                       |
| b021e46c213785b8b7a719136ff3f0e8   | 0.60 | 0.045 | 0       | 3.1E-04 | 3.7E-04 | 0       | 1.2E-04 | 2.1E-03 | Bacteria | Proteobacteria  | Gammaproteobacteria | Xanthomonadales     | Sinobacteraceae      |                          |                       |
| 46f18f7cd00ec2cc29bf94bd013c266b   | 0.43 | 0.045 | 0       | 0       | 0       | 0       | 3.5E-04 | 5.1E-04 | Bacteria | Proteobacteria  | Gammaproteobacteria | Xanthomonadales     | Xanthomonadaceae     | <i>Pseudoxanthomonas</i> |                       |
| b757da9aab56247367c4be7bb9cd0a8a   | 0.48 | 0.015 | 0       | 0       | 0       | 0       | 4.9E-05 | 2.3E-04 | 1.2E-04  | Bacteria        | Gammaproteobacteria | Xanthomonadales     | Xanthomonadaceae     | <i>Thermomonas</i>       |                       |
| b94769eb72718a0c512ade94384e3902   | 0.89 | 0.005 | 1.4E-04 | 2.2E-04 | 4.4E-04 | 1.0E-03 | 3.1E-03 | 1.2E-03 | Bacteria | Proteobacteria  | Gammaproteobacteria | Xanthomonadales     | Xanthomonadaceae     |                          |                       |
| 03af51e75c7ee46771685036b7c12f28   | 0.48 | 0.01  | 0       | 0       | 0       | 5.4E-04 | 9.8E-05 | 6.4E-04 | Bacteria | Proteobacteria  | Gammaproteobacteria | Xanthomonadales     | Xanthomonadaceae     |                          |                       |
| c68c29d09b76c67387ce138485c0638    | 0.80 | 0.005 | 0       | 0       | 1.2E-03 | 6.8E-04 | 2.1E-03 | 3.6E-03 | Bacteria | Proteobacteria  |                     |                     |                      |                          |                       |
| 9d8d2207f5cd5cc728eca6f6d158067f   | 0.37 | 0.05  | 0       | 0       | 0       | 0       | 0       | 2.0E-04 | Bacteria | Proteobacteria  |                     |                     |                      |                          |                       |
| 35aad30ee9d0eb6978b890cbe2dc733    | 0.43 | 0.05  | 0       | 0       | 0       | 0       | 2.0E-04 | 1.2E-04 | Bacteria | Verrucomicrobia | Methylacidiphilae   | Methylacidiphilales |                      |                          |                       |
| e21c09657a2167f7cfe532907679ae37   | 0.52 | 0.01  | 0       | 0       | 0       | 0       | 0       | 9.0E-04 | Bacteria | Verrucomicrobia | Pedospaerae         | Pedospaerales       | auto67_4W            |                          |                       |
| 385b00f19a2598a2de1b9e467a26d923   | 0.48 | 0.005 | 0       | 0       | 0       | 1.5E-04 | 1.2E-04 | 5.9E-04 | Bacteria | Verrucomicrobia | Pedospaerae         | Pedospaerales       |                      |                          |                       |
| 271b576cc1f2ce84b35d8374ed9909db4  | 0.75 | 0.005 | 0       | 0       | 1.2E-03 | 1.6E-03 | 1.1E-03 | 2.2E-03 | Bacteria | Verrucomicrobia | Spartobacteria      | Chthoniobacterales  | Chthoniobacteraceae  | <i>DA101</i>             |                       |
| 9bb1f6bce7fddc12951e62ee0ff2b6f    | 0.65 | 0.005 | 0       | 0       | 7.1E-05 | 7.3E-04 | 2.3E-04 | 5.9E-04 | Bacteria | Verrucomicrobia | Spartobacteria      | Chthoniobacterales  | Chthoniobacteraceae  | <i>DA101</i>             |                       |
| 57f3562d588b974e7979619da315d1f6   | 0.52 | 0.01  | 0       | 0       | 0       | 0       | 5.9E-04 | 2.2E-04 | 9.8E-05  | Bacteria        | Verrucomicrobia     | Chthoniobacterales  | Chthoniobacteraceae  | <i>Ellin506</i>          |                       |
| 9bdcf8c204acd298aba85b062603595    | 0.57 | 0.02  | 0       | 8.4E-05 | 1.6E-04 | 0       | 3.9E-05 | 1.7E-03 | Bacteria | Verrucomicrobia | Spartobacteria      | Chthoniobacterales  | Chthoniobacteraceae  | <i>Ellin506</i>          |                       |
| 734e4849488a1c091a492e8f2ea94cd0   | 0.64 | 0.005 | 0       | 0       | 0       | 0       | 9.8E-05 | 0       | 1.5E-03  | Bacteria        | Verrucomicrobia     | Opitutae            | Opitutaceae          | <i>Opitutus</i>          |                       |
| 450b51af1ad7e19a21c38ed65d3794d    | 0.43 | 0.035 | 0       | 0       | 0       | 3.9E-04 | 3.5E-04 | 2.0E-04 | Bacteria | Verrucomicrobia | Opitutae            | Opitutales          | Opitutaceae          | <i>Opitutus</i>          |                       |
| 7fe72824f63885bb1dd42b9e81723164   | 0.47 | 0.01  | 0       | 0       | 1.8E-05 | 0       | 0       | 8.8E-04 | Bacteria | Verrucomicrobia | Opitutae            | Opitutales          | Opitutaceae          |                          |                       |
| 102ef5be319                        |      |       |         |         |         |         |         |         |          |                 |                     |                     |                      |                          |                       |
